1 **Small molecule cognitive enhancer reverses age-related memory decline in mice.**

2  
3 **SHORT TITLE** (less than 40 characters): **Reversing aging related deficits**

4  
5 **Authors:** Karen Krukowski<sup>1,2</sup>, Amber Nolan<sup>2,3,\*</sup>, Elma S. Frias<sup>1,2,\*</sup>, Morgane Boone<sup>4\*</sup>,  
6 Gonzalo Ureta<sup>5</sup>, Katherine Grue<sup>1,2</sup>, Maria-Serena Paladini<sup>1,2</sup>, Edward Elizarraras<sup>1,2</sup>, Luz  
7 Delgado<sup>5</sup>, Sebastian Bernales<sup>5</sup>, Peter Walter<sup>4,6</sup> and Susanna Rosi<sup>1,2,7,8,9</sup>

8  
9 <sup>1</sup> Department of Physical Therapy and Rehabilitation Science, University of California at  
10 San Francisco, San Francisco, CA, USA.

11 <sup>2</sup> Brain and Spinal Injury Center, University of California at San Francisco, San  
12 Francisco, CA, USA.

13 <sup>3</sup> Department of Pathology, University of California at San Francisco, San Francisco,  
14 CA, USA.

15 <sup>4</sup> Biochemistry and Biophysics, University of California at San Francisco, San Francisco  
16 CA, USA.

17 <sup>5</sup> Fundación Ciencia & Vida, Santiago, Chile.

18 <sup>6</sup> Howard Hughes Medical Institute, University of California at San Francisco, San  
19 Francisco, CA, USA.

20 <sup>7</sup> Department of Neurological Surgery, University of California at San Francisco, San  
21 Francisco, CA, USA.

22 <sup>8</sup> Weill Institute for Neuroscience, University of California at San Francisco, San  
23 Francisco, CA, USA.

24 <sup>9</sup> Kavli Institute of Fundamental Neuroscience, University of California at San Francisco,  
25 San Francisco, CA, USA.

26  
27 \*authors contributed equally

28 **Corresponding Authors:**

29  
30 Susanna Rosi, Ph.D. Lewis and Ruth Cozen Chair II

31 Professor

32 1001 Potrero Ave,

33 Zuckerberg San Francisco General Hospital

34 Building #1 Room 101

35 San Francisco, CA 94110

36 Tel.: +1-415-206-3708

37 Email: [susanna.rosi@ucsf.edu](mailto:susanna.rosi@ucsf.edu)

38  
39 Peter Walter, PhD, Professor

40 Box 2200, UCSF

41 San Francisco, CA 94143

42 Phone: +1-415-476-5017

43 Email: [peter@walterlab.ucsf.edu](mailto:peter@walterlab.ucsf.edu)

44

45 **ONE SENTENCE SUMMARY**

46 Inhibition of the integrated stress response restores neuronal and immune dysfunction  
47 and alleviates memory deficits in aged mice.

48

## 49 **ABSTRACT**

50 With increased life expectancy, age-associated cognitive decline becomes a growing  
51 concern. The integrated stress response (ISR) is activated during aging and contributes  
52 to age-related brain phenotypes. We demonstrate that treatment with the drug-like small-  
53 molecule ISR inhibitor ISRIB reverses ISR activation in the brain, as indicated by  
54 decreased activating transcription factor 4 (ATF4) protein levels. Furthermore, ISRIB  
55 treatment reverses spatial memory deficits and ameliorates working memory in old mice.  
56 At the cellular level in the hippocampus, ISR inhibition i) rescues intrinsic neuronal  
57 electrophysiological properties, ii) restores spine density and iii) reduces immune profiles,  
58 specifically interferon and T cell-mediated responses. Thus, pharmacological interference  
59 with the ISR emerges as a promising intervention strategy for combating age-related  
60 cognitive decline.

61

## 62 **INTRODUCTION**

63

64 “Of the capacities that people hope will remain intact as they get older, perhaps the most  
65 treasured is to stay mentally sharp” (1).

66

67 The impact of age on cognitive performance represents an important quality-of-life and  
68 societal concern, especially given our prolonged life expectancy. Decreases in executive  
69 function as well as learning and memory decrements in older individuals are common (2,  
70 3, 4, 5). According to the US Department of Commerce the aging population is estimated  
71 by 2050 to reach 83.7 million individuals above 65 years of age in the US; this represents  
72 a rapidly growing healthcare and economic concern (6).

73

74 Age-related decline in spatial memory has been recapitulated in preclinical studies with  
75 old rodents (7-10). The hippocampus is the brain region associated with spatial learning  
76 and memory formation and is particularly vulnerable to age-related changes in humans  
77 and rodents (11-14). Deficits in a number of cellular processes have been suggested as  
78 underlying causes based on correlative evidence, including protein synthesis (15),  
79 metabolism (16), inflammation (17), and immune responses (9, 18-20). While providing a  
80 wealth of parameters to assess, by and large the causal molecular underpinnings of age-  
81 related memory decline have remained unclear.

82

83 The principle that blocking protein synthesis prevents long-term memory storage was  
84 discovered many years ago (21). With age there is a marked decline of protein synthesis  
85 in the brain that correlates with defects in proper protein folding (22-24). Accumulation of  
86 misfolded proteins can activate the integrated stress response (ISR) (25), an evolutionary  
87 conserved pathway that decreases protein synthesis. In this way, the ISR may have a  
88 causative role in age-related cognitive decline. We previously discovered that interference  
89 with the drug-like small-molecule inhibitor (integrated stress response inhibitor, or ISRIB)  
90 rescued traumatic brain injury-induced behavioral and cognitive deficits (26, 27),  
91 suggesting that this pharmacological tool may be useful in testing this notion.

92

93 Increasing age leads to structural and functional changes in hippocampal neurons.  
94 Specifically, in old animals there is an increase in neuronal hyperpolarization after spiking  
95 activity ("afterhyperpolarization", or AHP) that decreases intrinsic neuronal excitability and

96 correlates with memory deficits (11-14, 28). Aging also manifests itself with synaptic  
97 excitability changes in the hippocampus that correlate with a reduction in the bulbous  
98 membrane projections that form the postsynaptic specializations of excitatory synapses,  
99 termed dendritic spines (29, 30). Morphological changes in dendritic spine density is  
100 critical for spatial learning and memory (31, 32). Whether these age-related neuronal  
101 changes can be modified or are linked with ISR activation has yet to be determined.

102

103 In addition to neuronal changes, ISR activation can modify immune responses via  
104 alterations in cytokine production (33). Indeed, maladaptive immune responses have  
105 been linked with cognitive decline in the old brain (8, 9, 18, 20). Initial studies focused on  
106 age-associated cytokine responses, including interferon (IFN)-mediated cognitive  
107 changes (18, 34). Type-I IFN responses can induce age-related phenotypes in rodents.  
108 Furthermore, the adaptive immune system (T cell infiltration into the old brain) can  
109 regulate neuronal function via IFN- $\gamma$  production (19), suggesting the possibility that age-  
110 induced maladaptive immune responses and the ISR are linked. Here we explore the  
111 possibility of ISR inhibition by ISRIB as a potential strategy for modifying age-induced  
112 neuronal, immune, and cognitive dysfunction.

113

114

## 115 **RESULTS**

116

117 *ISRIB resets the ISR in the brain of old mice.*

118

119 ISR activation leads to global reduction in protein synthesis but also to translational up-  
120 regulation of a select subset of mRNAs whose translation is controlled by small upstream  
121 open-reading frames in their 5'-UTRs (35, 36). One well-studied ISR-upregulated target  
122 protein is ATF4 (activating transcription factor 4) (37, 38). We recently showed ISRIB  
123 administration reversed mild head trauma-induced elevation in ATF4 protein (27). Using  
124 the same ISRIB treatment paradigm of 3 injections on consecutive days (26, 27), we  
125 found decreased age-associated ATF4 protein levels in mouse brain lysates when  
126 compared to vehicle-treated controls during ISRIB administration (**Figure 1A, B;**  
127 **Supplemental Figure 1**). Similar trends were observed in lysates from hippocampal  
128 tissue (**Supplemental Figure 2**). ATF4 levels 18 days after cessation of ISRIB treatment  
129 showed persistent reduction in age-induced ATF4 protein levels that were  
130 indistinguishable from young mice (**Figure 1A, C**). Thus, acute ISRIB administration in  
131 the old brain has long-lasting, chronic effects on ISR activation.

132

133

134 *Inhibition of the ISR reverses age-induced decline in spatial learning and memory.*

135

136 To assess whether the reduction in ISR activation affects age-related cognitive defects,  
137 we tested the capacity for spatial learning and memory in young and old mice in a radial  
138 arm water maze (26, 39). In this forced-swim behavioral test, animals were trained for two  
139 days (two learning blocks/day) to locate a platform hidden under opaque water in one of  
140 the eight arms using navigational cues set in the room (**Figure 2A**). We recorded the total  
141 number of entries into the non-target arm (errors) before the animal found the escape

142 platform with automated tracking software and used it as a metric of learning. After two  
143 days of training, young animals averaged one error prior to successfully locating the  
144 escape platform, while old animals averaged three errors, indicating their reduced  
145 learning capacity (**Supplemental Figure 3A**).

146  
147 We next tested whether pharmacological inhibition of the ISR could modify the age-  
148 related spatial learning deficits. ISRIB treatment started the day before the first training  
149 day and continued with daily injections throughout the duration of the training (3 injections  
150 in total; see **Figure 2A**, left). By the end of two days of training, ISRIB-treated old animals  
151 averaged two errors prior to finding the escape platform, while vehicle-treated old animals  
152 averaged three, denoting significant learning improvement in the mice that received ISRIB  
153 (**Supplemental Figure 3B**). No difference in learning performance was measured in  
154 young mice that received the identical treatment paradigm (**Supplemental Figure 3C**),  
155 suggesting that ISRIB-induced learning improvement measured in this training regime is  
156 age-dependent. These results were confirmed in an independent old animal cohort, in  
157 which we tested an additional ISR inhibitor (Cmp-003, a small molecule with improved  
158 solubility and pharmacological properties (PCT/US18/65555)), using an identical  
159 training/injection paradigm (**Supplemental Figure 3D**). Old animals that received Cmp-  
160 003 made significantly fewer errors prior to locating the escape platform than old animals  
161 that received vehicle injections, again indicating significant learning improvement.

162  
163 Spatial memory of the escape location was measured eight days later by reintroducing  
164 the animals into the pool and measuring the number of errors before they located the

165 hidden platform. The animals did not receive any additional treatment during this task.  
166 Old mice treated with ISRIB one week before made significantly fewer errors compared  
167 to matched, vehicle-treated old male (**Figure 2B**) and female (**Supplemental Figure 4**)  
168 mice. Remarkably, the memory performance of old animals treated with ISRIB a week  
169 before was comparable to that of young mice (**Figure 2B**). These results demonstrate  
170 that acute treatment with ISRIB in old mice rescues chronic age-induced spatial learning  
171 deficits, cementing a causative role of the ISR in rendering long-term memory  
172 consolidation dysfunctional.

173

174

175 *ISRIB administration improves age-induced deficits in working and episodic memory*  
176 *weeks after treatment.*

177

178 Given the long-lasting effect of acute ISRIB treatment on ATF4 protein levels in the brain  
179 and on memory function one week after drug administration, we next tested the duration  
180 of ISRIB effects on age-related cognitive function. On day 20 post ISRIB treatment  
181 (**Figure 2A**, right), we measured working and episodic memory using a delayed-  
182 matching-to-place paradigm (DMP) (26, 40) in the same animal cohort without additional  
183 ISRIB treatment. During DMP animals learned to locate an escape tunnel attached to one  
184 of 40 holes in a circular table using visual cues. The escape location was changed daily,  
185 forcing the animal to relearn its location. To quantify performance, we used analysis  
186 tracking software to measure “escape latency”, reporting the time taken by the mouse to  
187 enter the escape tunnel.



188

189 Old mice that received ISRIB treatment 20 days earlier displayed significant improvement  
190 over the four-day testing period (**Figure 2C**; Day 20 vs. Day 23). By Day 23 post-treatment  
191 animals were locating the escape tunnel on average 20 seconds faster than the matched-  
192 vehicle group (**Figure 2C**). This behavior is indicative of improved working and episodic  
193 memory. By contrast, old animals that received vehicle injections did not learn the task  
194 (**Figure 2C, D**; Day 20 vs. Day 23), as previously observed (8, 10). The performance  
195 improvement, measured as escape time on Day 20 minus escape time on Day 23, was  
196 significantly elevated in ISRIB-treated when compared to the vehicle-treated group  
197 (**Figure 2D**). These results demonstrate that ISRIB administration increases cognitive  
198 performance in a behavioral paradigm measured weeks after administration.

199

200

201 *ISRIB treatment reverses age-associated changes in hippocampal neuron function.*

202

203 To determine how ISRIB treatment might improve cognition, we investigated the effects  
204 of ISRIB treatment on hippocampal neuronal function. Utilizing whole cell patch clamp,  
205 we recorded neuronal electrophysiological properties, including the afterhyperpolarization  
206 (AHP), in hippocampal CA1 pyramidal neurons of young mice and old mice with vehicle  
207 injections, and old mice subjected to a single injection of ISRIB (**Figure 3A**).

208

209 To evaluate for alternations in intrinsic neuronal excitability, we measured action  
210 potentials and membrane properties in response to a series of hyperpolarizing and

211 depolarizing current steps (20 steps from -250 to 700 pA, 250 msec duration), including  
212 the AHP following ~50 Hz spiking activity (i.e. post-burst AHP) induced with a current  
213 step (**Figure 3A**). In agreement with previous reports (11-14, 28), old mice displayed a  
214 significantly increased AHP amplitude when compared to young mice (**Figure 3B**). ISRIB  
215 treatment reversed the age-induced increase in AHP amplitude, rendering ISRIB-treated  
216 old mice indistinguishable from young ones (**Figure 3B**). We measured no significant  
217 differences in other passive membrane and active spiking properties between groups  
218 (**Supplemental Figure 5**). In addition, spontaneous excitatory postsynaptic currents  
219 (sEPSC) were indistinguishable between groups (**Supplemental Figure 6**). These data  
220 suggest that ISRIB treatment in old animals restores intrinsic excitability by specifically  
221 reducing the post-burst AHP back to a youthful level.

222

223

224 *ISRIB treatment reduces dendritic spine loss.*

225

226 To determine if ISRIB might affect age-induced synaptic structural changes, we quantified  
227 dendritic spine density after ISRIB treatment in old mice with fluorescently labeled  
228 excitatory neurons (marked by a genomically encoded Thy1-YFP fusion protein). The  
229 hippocampus of old mice is characterized by a reduction in dendritic spine numbers that  
230 correlates with diminished cognitive output (29, 30). Old Thy1-YFP expressing mice  
231 received ISRIB treatment and two days of behavioral training as described in **Figure 2A**.  
232 At the end of Day 2, we terminated the animals and harvested the brains for quantification  
233 of dendritic spine numbers in the hippocampus (stratum radiatum of CA1) (**Figure 3C**)

234 using confocal microscopy imaging and unbiased analysis (**Figure 3D**). Similar to  
235 previous reports, we measured a significant reduction in dendritic spine density in old  
236 when compared to young Thy1-YFP mice (**Figure 3E**) (29, 30). ISRIB treatment  
237 significantly increased spine numbers when compared with age-matched vehicle-treated  
238 mice (**Figure 3E**). Taken together these data demonstrate that within 1-2 days of ISRIB  
239 administration both neuron structure and function in old mice are restored to those of  
240 young animals.

241  
242 *Age-induced interferon (IFN) and T cell responses are reduced following ISRIB treatment.*

243  
244 To determine differential gene expression patterns impacted by ISRIB administration in  
245 the old brain, we performed an unbiased bulk RNA sequencing analysis of hippocampus  
246 extracts from three old vehicle-treated and old ISRIB-treated mice after two ISRIB  
247 administrations. Due to the heterogeneity observed in old animals, our initial analysis did  
248 not reveal significant differences between groups (**Supplemental Figure 7A**). However,  
249 we observed strong trends when a single old outlier mouse was removed. A number of  
250 immune and immune regulatory pathways (118 genes total), in particular those related to  
251 IFN signaling, were down-regulated after ISRIB treatment (**Figure 4A and Supplemental**  
252 **Figure 7**). Since immune dysregulation in the brain increases with age (41)  
253 (**Supplemental Figure 8**) and is known to correlate with reduced cognitive performance  
254 in the old animals (8, 9, 18, 20), we decided to follow up on these statistically  
255 unsubstantiated yet intuitively appealing clues. To this end, we next performed  
256 quantitative PCR (qPCR) analyses on hippocampi from young, old, and old + ISRIB

257 animals immediately after two ISRIB administrations. These analyses confirmed that age  
258 increased expression of a number of IFN response pathway genes, *Ifit1*, *Gbp10*, and *Rtp4*  
259 (**Figure 4B-D**). Importantly, ISRIB administration reduced expression of *Ifit1*, *Gbp10*, and  
260 *Rtp4* to levels indistinguishable from young animals (**Figure 4B-D**).

261  
262 We next measured T cell responses in old mice with or without ISRIB treatment (two  
263 injections, **Figure 2A**). Similar to other reports (19, 42), we observed a significant  
264 increase in T cell marker expression (CD3) in the hippocampus of old compared to young  
265 mice (**Figure 4E**). ISRIB treatment in the old mice reduced the expression of the T cell  
266 marker comparable to that observed in young mice (**Figure 4E**), suggesting a link  
267 between the IFN response and T cell recruitment to the brain. T cell marker expression  
268 in the brain correlated with cognitive performance: mice with lower T cell marker  
269 expression made fewer errors prior to locating the escape platform during memory testing  
270 on Day 2 (**Figure 4F**). The ISRIB-induced reduction in T cell marker levels was not limited  
271 to the brain but extended to the peripheral blood of old animals, with CD8<sup>+</sup> T cell  
272 percentages reduced following ISRIB administration (**Figure 4G**). By contrast, we  
273 observed no changes in CD4<sup>+</sup> T cell levels (**Figure 4H**). Overall, ISRIB treatment impacts  
274 immune parameters both in the periphery and in the brain.

275

## 276 **CONCLUSION**

277 We provide evidence for a direct involvement of the ISR in age-related cognitive decline.  
278 Temporary treatment with ISRIB causes down-regulation of ATF4 that is sustained for at  
279 least 20 days. This “ISR reset” leads to improvement in spatial and working memory. At

280 a cellular level the cognitive enhancement is paralleled by i) improved intrinsic neuron  
281 excitability, ii) increased dendritic spine density and iii) reversal of age-induced changes  
282 in IFN and T cell responses in the hippocampus and blood. Thus, we identify broad-  
283 spectrum anatomical, cellular, and functional changes caused by ISR activation in old  
284 animals. If these findings in mice translate into human physiology, they offer hope and a  
285 tangible strategy to sustain cognitive ability as we age.

286

287

288

289

290

291

292 **FIGURE LEGENDS**

293

294 **Figure 1. ISRIB down-regulates the ISR in the brain of old mice.** (A) Experimental  
295 dosing scheme- ISRIB treatment denoted by syringes (3 injections). ISRIB treatment  
296 reduced ATF4 protein levels (B) acutely during drug administration and (C) chronically 18  
297 days after ISRIB treatment was complete. ATF4 protein levels normalized to actin and  
298 graphed relative to old mice. (B) Old males (7) and females (3): Vehicle n = 10; ISRIB n  
299 =10. Student's t-test. \*p < 0.05. (C) Young and old males. Young n = 5, Old = 3, Old +  
300 ISRIB = 3. One-way ANOVA (F = 18.8, p < 0.001); with Tukey post-hoc analysis. \*p <  
301 0.05; \*\*\*p < 0.001. Individual animal values represented by dots; lines depict group mean  
302 ± SEM.

303

304 **Figure 2. Inhibition of the ISR reverses age-induced decline in spatial learning and**  
305 **memory.** (A) Experimental Design: Old (~19 months) animals underwent behavioral  
306 analysis in a radial arm water maze (RAWM) and a delayed matching to place paradigm  
307 (DMP). ISRIB or vehicle administration (2.5 mg/kg intraperitoneal) occurred daily during  
308 the learning phase of RAWM denoted by syringes (days 0-2). (B) ISRIB treatment  
309 improved memory one week after administration in male rodents. One-way ANOVA (F =  
310 5.3, p < 0.05); with Tukey post-hoc analysis. Young n = 10; Old n = 25; Old + ISRIB n =  
311 21. (C,D) Age-induced deficits in working and episodic learning and memory restored  
312 weeks after ISRIB administration. Animals performed the DMP from day 20 - 23. (C)  
313 Average of all trials per group for each day. Two-way repeated measures ANOVA reveals  
314 a significant difference between groups p < 0.01 (denoted in figure legend) and time effect  
315 p < 0.01. (D) ISRIB animals displayed significant improvement when compared with the  
316 vehicle group. Student t-test. \*p < 0.05, \*\*p < 0.01. Old n = 18; Old + ISRIB n = 16.  
317 Individual animal scores represented by dots; lines depict group mean ± SEM.

318

319

320 **Figure 3. ISRIB treatment alleviates age-associated changes in CA1 pyramidal**  
321 **neuron function and structure.** (A) Left: Image of pipette patched onto CA1 neuron in  
322 sagittal slice of hippocampus. Right: Representative traces from hippocampal CA1  
323 pyramidal neurons from old animals treated with either vehicle (light blue) or ISRIB (dark  
324 blue) or young animals treated with vehicle (orange) showing the response to a current  
325 injection eliciting ~50Hz spiking activity. Spikes are truncated (dashed line), and the AHP  
326 is visualized immediately following cessation of current injection (yellow square) and  
327 quantified as the change in voltage from baseline (dotted line). (B) Age-induced increases  
328 in AHP were measured when comparing young and old animals. ISRIB treatment  
329 reversed increased AHP to levels indistinguishable from young animals. One-way  
330 ANOVA (F = 4.461, p < 0.05); with Tukey post-hoc analysis. \*p < 0.05. Each neuron is  
331 represented with a symbol; lines indicate the mean ± SEM (Neurons: n = 10 young +  
332 vehicle (5 animals); n = 12 old + vehicle (5 animals), n = 19 old + ISRIB (7 animals) with  
333 1-5 neurons recorded per animal. (C-E) Spine density was quantified in the CA1 region  
334 of the dorsal hippocampus from young and old Thy1-YFP-H mice. (C) Diagram of  
335 hippocampal region analyzed. SR = stratum radiatum. (D) Representative images from  
336 Old and Old + ISRIB mice. (E) A decrease in dendritic spine density was measured when  
337 comparing old mice to young mice. ISRIB treatment significantly increased spine density

338 levels of old mice when compared to vehicle treated old mice. 63x magnification with a  
339 water immersion objective. Young males n = 7 slides (2 animals); Old males + Vehicle n  
340 = 12 slides (3 mice); Old males + ISRIB n = 17 slides (4 mice). Individual slide scores  
341 (relative to old mice) represented in dots, lines depict group mean  $\pm$  SEM. One-way  
342 ANOVA (F = 18.57, p < 0.001) with Tukey post-hoc analysis. \*\*p < 0.01; \*\*\*p < 0.001.

343  
344 **Figure 4. Age-induced IFN and T cell responses are reduced following ISRIB**  
345 **treatment.** (A) Bulk RNA-sequencing analysis revealed that of the 129 differentially  
346 expressed genes (red dots, FDR < 0.05 and min. 1.2-fold change), 118 genes were down  
347 regulated with ISRIB treatment, with a strong enrichment for IFN pathway genes (red dots  
348 with black line). DE = differentially expressed. (B-D) IFN response pathways (*Ifit1*, *Gbp10*,  
349 *Rtp4*,) were investigated in the hippocampus of young and old mice by qPCR analysis.  
350 ISRIB administration reversed age-induced increases in (B) *Ifit1*, One-way ANOVA (F =  
351 8.8; p < 0.01) with a Tukey-post analysis. Young n = 8; Old n = 7; Old + ISRIB n = 8) (C)  
352 *Gbp10*, One-way ANOVA (F = 4.2, p < 0.05) with a Tukey-post analysis. Young n = 8; Old  
353 n = 7; Old + ISRIB n = 7) and (D) *Rtp4*, One-way ANOVA (F = 12.23, p < 0.001) with a  
354 Tukey-post analysis. Young n = 8; Old n = 7; Old + ISRIB n = 8) levels. \*p < 0.05; \*\*p <  
355 0.01; \*\*\*p < 0.001. (E) CD3 gene-expression changes in the hippocampus of young and  
356 old animals were measured by qPCR analysis, comparing expression levels between  
357 young, old and old + ISRIB. CD3, a marker for T cells, was significantly increased with  
358 age. ISRIB administration returned CD3 expression levels to those comparable to young  
359 animals. One-way ANOVA (F = 5.2; p < 0.05). Tukey-post hoc analysis. Young n = 8; Old  
360 n = 7; Old + ISRIB n = 8. (F) A significant positive correlation was measured between T  
361 cell expression levels in the hippocampus and cognitive performance. Linear regression  
362 was measured by Pearson R correlation (R<sub>2</sub> = 0.27; F = 8.0, p < 0.001). (G, H) Peripheral  
363 T cell levels were measured by flow cytometric analysis of whole blood. (G) ISRIB  
364 treatment reduced CD8<sup>+</sup> T cell percentages (of CD45<sup>+</sup> cells) in the peripheral. Student t-  
365 test. Old n = 7; Old + ISRIB n = 8. \*p < 0.05. (H) CD4<sup>+</sup> T cell percentages (of CD45<sup>+</sup> cells)  
366 were not impacted. Individual animal scores represented by dots; lines depict group mean  
367  $\pm$  SEM.

368  
369  
370 **Supplemental Figure 1. ISRIB down-regulates ISR-induced pathways.** The impact of  
371 ISRIB on known ISR activation pathways was investigated by Western blot analysis of  
372 brain lysates (raw Western blot data). Each lane represents an individual animal brain  
373 extract. (A) Acute end points. (B) Chronic end points.

374  
375 **Supplemental Figure 2. Impact of ISRIB on ISR-induced pathways in the**  
376 **hippocampus.** The impact of ISRIB on known ISR activation pathways was investigated  
377 by Western blot analysis of hippocampal lysates (A). Raw Western blot data. Each lane  
378 represents an individual animal hippocampus extract. (B) ISRIB treatment reduced ATF4.  
379 ATF4 protein levels normalized to actin graphed relative to old mice: Old n = 10; Old +  
380 ISRIB n = 10. Student's unpaired t-test. Individual animal scores represented by dots;  
381 lines depict group mean  $\pm$  SEM.

382

383 **Supplemental Figure 3. ISR inhibitors relieve age-induced deficits in spatial**  
384 **learning.** RAWM was used to measure age-induced deficits in spatial learning. Animals  
385 ran 2 blocks on each learning day. **(A)** Old animals performed significantly worse than  
386 young animals. Two-way repeated measures ANOVA revealed a significant interaction ( $p$   
387  $< 0.001$ ). Bonferroni post-hoc to determine differences at various blocks. Old males  $n =$   
388  $19$ , Young males  $n = 10$ .  $*p < 0.05$ . **(B)** ISRIB or vehicle administration ( $2.5$  mg/kg  
389 intraperitoneal) occurred days 0-2. Compared with the old group, ISRIB treated animals  
390 made significantly fewer errors over the course of learning. Two-way repeated measures  
391 ANOVA reveals a significant difference between groups  $p < 0.05$ . Old  $n = 19$ ; Old + ISRIB  
392  $n = 15$ . **(C)** No differences were measured between young +/- ISRIB administration. Two-  
393 way repeated measures ANOVA revealed no significant differences. Young males +  
394 vehicle  $n = 10$ ; Young males + ISRIB  $n = 10$  **(D)** Cmp-003 ( $5$  mg/kg intraperitoneal)  
395 administration occurred days 0-2. Old mice that received Cmp-003 performed significantly  
396 better than old mice that received vehicle. Two-way repeated measures ANOVA revealed  
397 a significant group ( $p < 0.01$ ) and time effect ( $p < 0.05$ ). Old males  $n = 9$ , Old males +  
398 Cmp-003  $n = 9$ .  $**p < 0.01$ . Data are means  $\pm$  SEM.  
399

400 **Supplemental Figure 4. ISRIB reduces age-induced memory deficits in female mice.**  
401 RAWM was used to measure age-induced deficits in learning and memory. ISRIB  
402 treatment improved memory one week after administration in female rodents. Two-way  
403 ANOVA reveals a significant sex ( $p < 0.05$ ) and treatment effect ( $p < 0.01$ ). Old female  $n$   
404  $= 12$ ; Old female + ISRIB  $n = 11$ .  $**p < 0.01$ . Individual animal scores represented by  
405 dots, lines depict group mean and SEM.  
406

407 **Supplementary Figure 5. Age and ISRIB treatment do not modify other passive or**  
408 **active intrinsic membrane properties in CA1 pyramidal neurons.** **(A)** Representative  
409 traces from CA1 pyramidal neurons showing the membrane potential response to a  $250$   
410 pA current injection in neurons from old animals treated with either vehicle (light blue) or  
411 ISRIB (dark blue) or young animals treated with vehicle (orange). Quantification of the  
412 action potential (AP) including the half width **(B)**, amplitude **(C)**, and threshold **(D)** did not  
413 show significant differences between CA1 pyramidal recordings from old, old + ISRIB-  
414 treated, or young mice. Likewise, evaluation of the maximum firing frequency **(E)** or how  
415 the frequency of spiking changes over time, quantified by the adaptation index **(F)** or with  
416 current injection, quantified by the slope of the relationship of firing frequency versus  
417 amplitude of current injection (F/I slope) **(G)** was also not significantly different between  
418 groups. Finally, passive membrane properties including the membrane time constant  
419 ( $\tau$ ) **(H)**, membrane resistance ( $R_m$ ) **(I)**, and the resting membrane potential **(J)** were not  
420 significantly altered by age or ISRIB treatment. Each neuron is represented with a symbol;  
421 solid lines indicate the mean  $\pm$  SEM. (One-way ANOVA for all comparisons; Neurons:  
422 and  $n = 12$  young + vehicle (5 animals);  $n = 15$  old + vehicle (5 animals),  $n = 22$  old +  
423 ISRIB (7 animals) with 1-5 neurons recorded per animal.  
424

425 **Supplemental Figure 6. Age and ISRIB treatment do not affect spontaneous**  
426 **excitatory post-synaptic currents (sEPSC) in CA1 pyramidal neurons.** **(A)**  
427 Representative whole cell voltage-clamp recordings showing sEPSCs from CA1  
428 pyramidal neurons from old animals treated with either vehicle (light blue) or ISRIB (dark



429 blue) or young animals treated with vehicle (orange). Arrows denote synaptic currents.  
430 (B) The sEPSC amplitude was not significantly difference between groups (one-way  
431 ANOVA). (C) The sEPSC frequency was unchanged after ISRIB treatment or compared  
432 to young mice (Kruskal-Wallis test). The median amplitude or frequency for each neuron  
433 is represented with a symbol; solid lines indicate the mean  $\pm$  SEM. (Neurons: n = 11  
434 young + vehicle (5 animals); n = 15 old + vehicle (5 animals), n = 18 old + ISRIB (7  
435 animals) with 1-5 neurons recorded per animal.)

436  
437 **Supplemental Figure 7. Impact of age and ISRIB on myeloid and inflammatory gene**  
438 **signatures.** (A) Multidimensional scaling analysis of the hippocampal transcriptome of 3  
439 'old' and 3 'old + ISRIB-treated' mice to visually represent the similarity of the RNA-seq  
440 data between mice. Including all mice in the analysis did not reveal a clear separation of  
441 groups, as mouse 3 of the 'old' cohort clusters together with the 'old + ISRIB-treated'  
442 mice, suggesting a similar transcriptomic profile. However, 'old' mouse 1 and 2 clearly  
443 cluster separately from the 'old + ISRIB-treated' mice, hinting at a clear transcriptional  
444 difference between both groups. (B-D) Transcriptional changes in the hippocampus of  
445 old mice point to a downregulation of innate immune and interferon signaling pathways in  
446 the brain upon treatment with ISRIB. Pathway enrichment of the 129 differentially  
447 expressed genes (DEGs) was calculated across the default databases using the DAVID  
448 Functional Annotation Clustering tool (B) and against the Gene Ontology (GO) database  
449 (C). DAVID functional clusters with Normalized Enrichment Score (NES) > 2 were  
450 manually annotated with the most appropriate overlapping term, while for GO enrichment,  
451 the top ten strongest hits are visualized. In parallel, Gene Set Enrichment Analysis across  
452 the entire ranked transcriptome also confirmed significant (FDR < 0.05) enrichment of the  
453 hallmark IFN $\gamma$  and IFN $\alpha$  pathways from the MSigDB database (D). Gene scores were  
454 calculated as  $\text{sign}(\log_2\text{FC}) * (-\log(\text{adj.p-value}))$ . Vertical black lines delineate the genes  
455 associated with the given pathway and their gene score rank in the transcriptional data  
456 along the x-axis. A negative enrichment score (green line) indicates enrichment of the  
457 pathway in downregulated genes. (E) 74.4% (96/129) of genes that change with ISRIB  
458 are interferon-responsive genes (as annotated in the Interferome v2.01 database, min. 2-  
459 fold change in mouse and human brain-specific datasets), with most being common  
460 targets of both type I (incl. IFN $\alpha$ , IFN $\beta$ ) and type II (IFN $\gamma$ ) IFN responses. (F) Transcription  
461 factor (TF) motifs for Interferon Response Factors (IRF) are the top hit when scanning the  
462 first 500 bp upstream of the transcriptional start site of DEGs, indicating that with ISRIB,  
463 the transcriptional changes are driven by interferon response factors. Motifs and  
464 associated TFs are clustered according to motif similarity with the Cytoscape iRegulon  
465 plugin.

466  
467 **Supplemental Figure 8. Impact of age on inflammatory expression profiles.**  
468 (A-D) Gene-expression changes in the hippocampus of young and old animals were  
469 measured by qPCR analysis. CCL2, a chemotactic ligand that recruits myeloid and some  
470 lymphoid cells into the brain parenchyma, was significantly increased with age. Pro-  
471 inflammatory cytokines IL-6, IL-1 $\beta$ , TNF $\alpha$  were modestly increased when comparing age  
472 and young animals. Student t-test \*p < 0.05. (A-C) Old n = 8, Old + ISRIB n = 7. (D) Old  
473 n = 7, Old + ISRIB n = 7. Individual animal values represented by dots; lines depict group  
474 mean and SEM.

475  
476  
477  
478  
479  
480  
481  
482  
483  
484  
485  
486  
487  
488  
489  
490  
491  
492  
493  
494  
495  
496  
497  
498  
499  
500  
501  
502  
503  
504  
505  
506  
507  
508  
509  
510  
511  
512  
513  
514  
515  
516  
517  
518  
519  
520

## METHODS

**Animals.** All experiments were conducted in accordance with National Institutes of Health (NIH) Guide for the Care and Use of Laboratory Animals and approved by the Institutional Animal Care and Use Committee of the University of California, San Francisco (Protocol 170302). Male and female C57B6/J wild-type (WT) mice were received from the National Institute of Aging. Thy-1-YFP-H (in C57 background) were bred and aged in house. Old animals started experimentation at ~19 months of age and young animals 3-6 months of age. Animal shipments were received at least one week prior to start of experimentation to allow animals to habituate the new surroundings. Mice were group housed in environmentally controlled conditions with reverse light cycle (12:12 h light:dark cycle at  $21 \pm 1$  °C; ~50% humidity) and provided food and water ad libitum. Behavioral analysis was performed during the dark cycle.

**Drug Administration.** ISRIB solution was made by dissolving 5 mg ISRIB in 2.5 mL dimethyl sulfoxide (DMSO) (PanReac AppliChem, 191954.1611). The solution was gently heated in a 40 °C water bath and vortexed every 30 s until the solution became clear. Next 1 mL of Tween 80 (Sigma Aldrich, P8074) was added, the solution was gently heated in a 40 °C water bath and vortexed every 30 s until the solution became clear. Next, 10 mL of polyethylene glycol 400 (PEG400) (PanReac AppliChem, 142436.1611) solution was added gently heated in a 40 °C water bath and vortexed every 30 s until the solution became clear. Finally, 36.5 mL of 5% dextrose (Hospira, RL-3040) was added. The solution was kept at room temperature throughout the experiment. Each solution was used for injections up to 7 day maximum. The vehicle solution consisted of the same chemical composition and concentration (DMSO, Tween 80, PEG400 and 5% dextrose). Stock ISRIB solution was at 0.1 mg/ml and injections were at 2.5 mg/kg. Each animal received an intraperitoneal injection of 2.5x their body weight.

Cmp-003 solution was made by dissolving Cmp-003 (donated by Praxis Biotech) in 50% PEG400 (PanReac AppliChem, 142436.1611) and 50% sterile water. The solution was gently heated in a 40 °C water bath and vortexed every 30 s until the solution became clear. Stock Cmp-003 solution was at 0.5 mg/ml and animal injections were at 5.0 mg/kg. Solution was used immediately and made fresh daily.

**Behavioral assessment of cognitive functions.** For all behavioral assays the experimenter(s) were blinded to therapeutic intervention. Prior to behavioral analysis animals were inspected for gross motor impairments. Animals were inspected for whisker loss, limb immobility (included grip strength) and eye occlusions. If animals displayed *any* of these impairments, they were excluded. Behavioral assessment was recorded and scored using a video tracking and analysis setup (Ethovision XT 8.5, Noldus Information Technology).

### *Radial Arm Water Maze.*

The radial arm water maze (RAWM) was used to test spatial learning and memory in rodents (26, 39). The pool is 118.5 cm in diameter with 8 arms, each 41 cm in length, and

521 an escape platform. The escape platform is slightly submerged below the water level, so  
522 it is not visible to the animals. The pool was filled with water that was rendered opaque  
523 by adding white paint (Crayola, 54–2128-053). Visual cues are placed around the room  
524 such that they were visible to animals exploring the maze. Animals ran 6 trials a day  
525 during learning and 3 trials during each memory probe. On both learning and memory  
526 days there is a 10-minute inter-trial interval. Animals were trained for 2 days and then  
527 tested on memory tests 24 hours and 7 days after training. During a trial, animals were  
528 placed in a random arm that did not include the escape platform. Animals were allowed  
529 1 min to locate the escape platform. On successfully finding the platform, animals  
530 remained there for 10 s before being returned to their warmed, holding cage. On a failed  
531 trial, animals were guided to the escape platform and then returned to their holding cage  
532 10 s later. The escape platform location was the same, whereas the start arm varied  
533 between trials.

534  
535 Animals were injected (intraperitoneal) with either vehicle or ISRIB (2.5 mg/kg) starting  
536 the day prior to behavior (**Figure 2A**) and after each of the final trials of the learning days  
537 (day 1 and 2) for a total of three doses. No injections were given when memory was tested  
538 on days 3 and 10. RAWM data were collected through a video tracking and analysis setup  
539 (Ethovision XT 8.5, Noldus Information Technology). The program automatically analyzed  
540 the number of entries into non-target arms made per trial. Every three trials were  
541 averaged into a block to account for large variability in performance; each learning day  
542 thus consisted of 2 blocks, whereas each memory test was one block each. Importantly,  
543 in all animal cohorts tested (regardless of age or drug treatment) learning was measured  
544 (Significant time effect observed in all Two-way repeated measure ANOVA analysis when  
545 groups are analyzed independently).

546  
547 *Delayed Matching to Place Barnes Maze.*

548 Beginning at day 20 animals were tested on DMP using a modified Barnes maze (26, 40).  
549 The maze consisted of a round table 112 cm in diameter with 40 escape holes arranged  
550 in three concentric rings consisting of 8, 16, and 16 holes at 20, 35, and 50 cm from the  
551 center of the maze, respectively. An escape tunnel was connected to one of the outer  
552 holes. Visual cues were placed around the room such that they were visible to animals  
553 on the table. Bright overhead lighting and a loud tone (2 KHz, 85 db) were used as  
554 aversive stimuli to motivate animals to locate the escape tunnel. The assay was  
555 performed for 4 days (days 20-23). The escape tunnel location was moved for each day  
556 and animals ran four trials on the first two days and 3 trials on the last two days. During  
557 a trial, animals were placed onto the center of the table covered by an opaque plastic box  
558 so they were not exposed to the environment. After they had been placed on the table for  
559 10 s, the plastic box was removed and the tone started playing, marking the start of the  
560 trial. Animals were given 90 s to explore the maze and locate the escape tunnel. When  
561 the animals successfully located and entered the escape tunnel, the tone was stopped. If  
562 the animals failed to find the escape tunnel after 90 s, they were guided to the escape  
563 tunnel before the tone was stopped. Animals remained in the escape tunnel for 10 s  
564 before being returned to their home cage. The maze was cleaned with ethanol between  
565 each trial. A new escape tunnel was used for each trial. The experimenter was blind to  
566 the treatment groups during the behavioral assay. Each trial was recorded using a video

567 tracking and analysis setup (Ethovision XT 8.5, Noldus Information Technology) and the  
568 program automatically analyzed the amount of time required to locate the escape tunnel.  
569 Animal improvement was calculated by Day 20 escape latency – Day 23 escape latency.

570  
571 Tissue collection. All mice were lethally overdosed using a mixture of ketamine (10 mg/ml)  
572 and xylazine (1 mg/ml). Once animals were completely anesthetized, blood was extracted  
573 by cardiac puncture and animals were perfused with 1X phosphate buffer solution, pH 7.4  
574 (Gibco, Big Cabin, OK, -70011-044) until the livers were clear (~1–2 min). For Western  
575 blot analysis following phosphate buffered solution (PBS), the whole brain (regions  
576 dissected discussed below) was rapidly removed and snap frozen on dry ice and stored  
577 at –80 °C until processing.

578 Western Blot Analysis. Animals received all 3 ISRIB injections and were terminated 20 h  
579 after the third injection (as described above). Frozen brain lysates or hippocampi isolates  
580 were then homogenized with a T 10 basic ULTRA-TURRAX (IKA) in ice-cold buffer lysis  
581 (Cell Signaling 9803) and protease and phosphatase inhibitors (Roche). Lysates were  
582 sonicated for 3 min and centrifuged at 13,000 rpm for 20 min at 4°C. Protein concentration  
583 in supernatants was determined using BCA Protein Assay Kit (Pierce). Equal amount of  
584 proteins was loaded on SDS-PAGE gels. Proteins were transferred onto 0.2 µm PVDF  
585 membranes (BioRad) and probed with primary antibodies diluted in Tris-buffered saline  
586 supplemented with 0.1% Tween 20 and 3% bovine serum albumin.

587  
588 ATF4 (11815) (Cell Signaling) and β-actin (Sigma-Aldrich) antibodies were used as  
589 primary antibodies. HRP-conjugated secondary antibodies (Rockland) were employed to  
590 detect immune-reactive bands using enhanced chemiluminescence (ECL Western  
591 Blotting Substrate, Pierce) according to the manufacturer instructions. Quantification of  
592 protein bands was done by densitometry using ImageJ software.

593  
594 ATF4 levels were normalized to β-actin expression and fold-change was calculated as  
595 the levels relative to the expression in vehicle-treated derived samples, which  
596 corresponds to 1.

597  
598 Electrophysiology.

599 Sagittal brain slices (250 µm) including the hippocampus were prepared from old mice  
600 (~19 mo) treated with either vehicle or ISRIB or young mice (~3 mo), treated with vehicle,  
601 12-18 hours prior (n = 5, 7, and 5 per group respectively). Mice were anesthetized with  
602 Euthasol (0.1 ml / 25 g, Virbac, Fort Worth, TX, NDC-051311-050-01), and transcardially  
603 perfused with an ice-cold sucrose cutting solution containing (in mM): 210 sucrose, 1.25  
604 NaH<sub>2</sub>PO<sub>4</sub>, 25 NaHCO<sub>3</sub>, 2.5 KCl, 0.5 CaCl<sub>2</sub>, 7 MgCl<sub>2</sub>, 7 dextrose, 1.3 ascorbic acid, 3  
605 sodium pyruvate (bubbled with 95% O<sub>2</sub> – 5% CO<sub>2</sub>, pH 7.4) (see **Supplemental Table 1**  
606 for reagent information). Mice were then decapitated and the brain was isolated in the  
607 same sucrose solution and cut on a slicing vibratome (Leica, VT1200S, Leica  
608 Microsystems, Wetzlar, Germany). Slices were incubated in a holding solution (composed  
609 of (in mM): 125 NaCl, 2.5 KCl, 1.25 NaH<sub>2</sub>PO<sub>4</sub>, 25 NaHCO<sub>3</sub>, 2 CaCl<sub>2</sub>, 2 MgCl<sub>2</sub>, 10 dextrose,  
610 1.3 ascorbic acid, 3 sodium pyruvate, bubbled with 95% O<sub>2</sub> – 5% CO<sub>2</sub>, pH 7.4) at 36 °C  
611 for 30 min and then at room temperature for at least 30 min until recording.

612

613 Whole cell recordings were obtained from these slices in a submersion chamber with a  
614 heated (32 – 34 °C) artificial cerebrospinal fluid (aCSF) containing (in mM): 125 NaCl, 3  
615 KCl, 1.25 NaH<sub>2</sub>PO<sub>4</sub>, 25 NaHCO<sub>3</sub>, 2 CaCl<sub>2</sub>, 1 MgCl<sub>2</sub>, 10 dextrose (bubbled with 95% O<sub>2</sub> -  
616 5% CO<sub>2</sub>, pH 7.4). Patch pipettes (3–6 MΩ) were manufactured from filamented  
617 borosilicate glass capillaries (Sutter Instruments, Novato, CA, BF100-58-10) and filled  
618 with an intracellular solution containing (in mM): 135 KGluconate, 5 KCl, 10 HEPES, 4  
619 NaCl, 4 MgATP, 0.3 Na<sub>3</sub>GTP, 7 2K-phosphocreatine, and 1-2% biocytin. CA1 pyramidal  
620 neurons were identified using infrared microscopy with a 40x water-immersion objective  
621 (Olympus, Burlingame, CA). Recordings were made using a Multiclamp 700B (Molecular  
622 Devices, San Jose, CA) amplifier, which was connected to the computer with a Digidata  
623 1440A ADC (Molecular Devices, San Jose, CA), and recorded at a sampling rate of 20  
624 kHz with pClamp software (Molecular Devices, San Jose, CA). We did not correct for the  
625 junction potential, but access resistance and pipette capacitance were appropriately  
626 compensated before each recording.

627  
628 The passive membrane and active action potential spiking characteristics were assessed  
629 by injection of a series of hyperpolarizing and depolarizing current steps with a duration  
630 of 250 ms from -250 pA to 700 nA (in increments of 50 pA). The resting membrane  
631 potential was the measured voltage of the cell 5 min after obtaining whole cell  
632 configuration without current injection. A holding current was then applied to maintain the  
633 neuron at -67 +/- 2 mV before/after current injections. The input resistance was  
634 determined from the steady-state voltage reached during the -50 pA current injection. The  
635 membrane time constant was the time required to reach 63% of the maximum change in  
636 voltage for the -50 pA current injection. Action potential parameters including the half  
637 width, threshold, and amplitude were quantified from the first action potential elicited.  
638 Action potential times were detected by recording the time at which the positive slope of  
639 the membrane potential crossed 0 mV. From the action potential times, the instantaneous  
640 frequency for each action potential was determined (1 / inter spike interval). The  
641 maximum firing frequency was the highest frequency of firing identified throughout all  
642 current injections. Action potential rate as a function of current injection was examined by  
643 plotting the first instantaneous action potential frequency versus current injection  
644 amplitude. The F/I slope was then determined from the best linear fit of the positive values  
645 of this plot. The action potential or spike threshold was defined as the voltage at which  
646 the third derivative of V (d<sup>3</sup>V/dt) was maximal just prior to the action potential peak. The  
647 action potential (AP) amplitude was calculated by measuring the voltage difference  
648 between the peak voltage of the action potential and the spike threshold. The half-width  
649 of the action potential was determined as the duration of the action potential at half the  
650 amplitude. The adaptation index of each cell was the ratio of the last over the first  
651 instantaneous firing frequency, calculated at 250 pA above the current step that first  
652 elicited spiking. The afterhyperpolarization (AHP) was calculated as the change in voltage  
653 from baseline (measured as the mean voltage over a 100 ms interval 600 ms after  
654 termination of a current injection that first elicited at least 12 spikes corresponding to a  
655 firing frequency of ~50 Hz) compared to immediately after cessation of current injection  
656 (the minimum voltage reached in the first 175 ms immediately after cessation of current  
657 injection). Cells were excluded from analysis if excessive synaptic input was noted during  
658 recording of the mAHP or if the cell did not fire at least 12 spikes during current injections.

659  
660 To measure the spontaneous excitatory postsynaptic currents (sEPSCs), cells were  
661 recorded in voltage clamp at a holding potential of -75 mV for 4 min, a holding potential  
662 that should have little inhibitory components given the reversal potential of chloride with  
663 these solutions. Analysis of sEPSCs was performed using a template matching algorithm  
664 in ClampFit 10.7 (Molecular Devices, San Jose, CA). The template was created using  
665 recordings from multiple pyramidal cells and included several hundred synaptic events.  
666 Access resistance (Ra) was monitored during recordings, and recordings were terminated  
667 if Ra exceeded 30 megaohms. Only stable recordings (< 50 pA baseline change) with a  
668 low baseline noise (< 8 pA root mean square) were included. The first 250 synaptic events  
669 or all the events measured in the 4 min interval from each cell were included for analysis.

670  
671 Fluorescent spine imaging preparation. For fluorescent spine analysis, following PBS  
672 animals were perfused with ice-cold 4% paraformaldehyde, pH 7.5 (PFA, Sigma Aldrich,  
673 St. Louis, MO, 441244) and fixed for 4 - 24 h followed by sucrose (Fisher Science  
674 Education, Nazareth, PA, S25590A) protection (15% to 30%). Brains were embedded  
675 with 30% sucrose/ Optimal Cutting Temperature Compound (Tissue Tek, Radnor, PA,  
676 4583) mixture on dry ice and stored at -80 °C. Brains were sectioned into 20 µm slides  
677 using a Leica cryostat (Leica Microsystems, Wetzlar, Germany) and mounted on slides  
678 (ThermoFisher Scientific, South San Francisco, CA). Slides were brought to room  
679 temperature (20 °C) prior to use. Tissues were fixed using ProLong Gold (Invitrogen,  
680 Carlsbad, CA, P36930) and a standard slide cover sealed with nail polish.

681 Spine density quantification. For spine density quantification, whole brains from young  
682 and old male Thy1-YFP-H transgenic line were used. 3-6 images separated by 60-140  
683 µm in the dorsal hippocampus were imaged per animal and used for dendritic spine  
684 density analysis. 9.3 µm z-stack images were acquired on a Zeiss Laser-Scanning  
685 Confocal microscope (Zeiss LSM 780 NLO FLIM) at the HDFCCC Laboratory for Cell  
686 Analysis Shared Resource Facility. 63x magnification with a water immersion objective.  
687 All protrusions from the dendrites were manually counted as spines regardless of  
688 morphology. Two individuals (blinded to age and treatment) analyzed a total length of at  
689 least 3200 µm of dendrites from each animal using NIH FIJI analysis software (v1.52n).  
690 Individual dendritic spine was calculated as density per micron and graphed relative to  
691 old mice.

692  
693 Bulk Sequencing.  
694 Frozen hippocampi were kept on dry ice and processed sample per sample until mRNA  
695 extraction. Each hippocampus was placed on wet ice and submerged with 300 µl freshly-  
696 made RNase-free lysis buffer (20 mM Tris-HCl pH 8.0, 140 mM KCl, 5 mM MgCl<sub>2</sub>, 100  
697 µg/ml cycloheximide, 1 mM DTT, 1% Triton X-100, 25 U/ml Turbo DNaseI (Thermo  
698 Scientific)). The tissue was then triturated for 10 strokes using a disposable RNase-free  
699 pellet pestle, followed by 10 passages through a 26G needle. Following centrifugation for  
700 10 mins at 4°C and 16,000 x g to remove unhomogenized debris, 50 µl of lysate was used  
701 for total RNA extraction using the DirectZol RNA miniprep kit (ZymoResearch). Lysate  
702 was mixed with 150 µl TRIzol reagent (Invitrogen), mixed, and incubated at room  
703 temperature for 5 mins. After addition of 150 µl 100% ethanol, samples were further  
704 purified according to the manufacturer's instructions, including DNaseI digest, and eluted

705 in 30  $\mu$ l RNase-free water. RNA integrity was confirmed using capillary electrophoretic  
706 analysis with BioAnalyzer RNA Pico 6000 chips (Agilent). All samples had a RIN (RNA  
707 Integrity Number)  $\geq 9$ .

708  
709 Next, ribosomal RNA was depleted using the RiboZero rRNA (human-mouse-rat)  
710 magnetic removal kit (Epicentre) following manufacturer's instructions. Samples were  
711 concentrated using the RNA Clean and Concentrator 5 kit (ZymoResearch) using 1  
712 volume of binding buffer and 1 volume 100% ethanol to ensure binding of intact, long  
713 RNA only. Samples were eluted in 8  $\mu$ l RNase-free water, 1  $\mu$ l was used to measure  
714 concentration using Nanodrop, and 1  $\mu$ l was used to confirm efficient ribodepletion using  
715 capillary electrophoresis (BioAnalyzer RNA Pico 6000, Agilent). Sequencing libraries  
716 were synthesized using the NEBNext Ultra Directional RNA-Seq kit (NEB) according to  
717 the manufacturer's instructions, with NEBNext Multiplex Oligos for Illumina (Index Primer  
718 Set 1, NEB) and HighPrep beads (MagBio Genomics). Depending on the concentration  
719 of each sample after adaptor ligation and purification, PCR enrichment was done for 9,  
720 10, or 11 cycles. Final libraries were run on the BioAnalyzer (High Sensitivity DNA chips,  
721 Agilent) to ensure efficient adaptor removal and absence of overamplification. Libraries  
722 were then pooled in equimolar amounts and sequenced on a NovaSeq S4 Flow Cell.

723  
724 For RNAseq data analysis, we used a combination of publicly available tools and custom  
725 scripts. Demultiplexed fastq files from different lanes were first combined, and Illumina  
726 adapter sequences were trimmed off with TrimGalore! (version\_0.4.4)  
727 ([www.bioinformatics.babraham.ac.uk/projects/trim\\_galore](http://www.bioinformatics.babraham.ac.uk/projects/trim_galore)). Contaminating ribosomal  
728 reads were removed by mapping against a fasta file of all *Mus musculus*  
729 rRNA/snoRNA/snRNA/MtrRNA/MttRNA downloaded from the Ensembl BioMart  
730 (Ensembl 92) using STAR (v2.5.3a) (43). Quality control of raw and processed fastq files  
731 was performed on a random subset of 1 million reads per sample using FastQC version  
732 0.11.3 (<https://www.bioinformatics.babraham.ac.uk/projects/fastqc/>). The unmapped  
733 reads were aligned to the *Mus musculus* GRCm38.92 Ensembl primary assembly, again  
734 using STAR, and bam files were sorted with samtools 1.1 (44). Count generation and  
735 downstream analysis were done in R (R project v3.1.2 and v3.4.0, [www.R-project.org](http://www.R-project.org))  
736 using a combination of the packages Rsubreads (45), EdgeR (46) plyr, ggplot2, gplots,  
737 ggrepel, plotly, corrplot, RColorBrewer, and data.table. Low read counts were removed  
738 using the EdgeR filterByExpr function, and read counts were normalized by library size.  
739 Differential expression was determined using the EdgeR Exact Test, which allows  
740 comparison of two groups of negative binomial random variables. The false discovery  
741 rate was set to 0.05. Tests for GO and KEGG pathway enrichment in the list of  
742 differentially expressed genes were performed in R, and across multiple ontogenies and  
743 databases with DAVID 6.8 (<https://david.ncifcrf.gov/>) using the default settings of their  
744 Functional Annotation Clustering tool. To assess pathway enrichment in a manner that is  
745 less dependent on gene significance cutoffs, gene set enrichment analysis of the entire  
746 dataset was performed against MSigDB using the GSEA software (47, 48), ranking genes  
747 according to gene score =  $\text{sign}(\log_2\text{FC}) * (-\log(\text{adj.pvalue}))$ , as described in Reimand et  
748 al (49). Transcription factor binding site enrichment in the first 500 bp upstream of the  
749 transcription initiation site of DEGs was done using the Cytoskape iRegulon plugin (50)  
750 with ROC threshold for AUC calculation set to 1%.

751  
752 A summary of the code used for data analysis is freely available on Figshare  
753 (10.6084/m9.figshare.10007312), and sequencing data can be found in NCBI's  
754 Sequence Read Archive under BioProject [SUB6444768](https://www.ncbi.nlm.nih.gov/bioproject/SUB6444768).

755  
756  
757 qPCR Analysis. Hippocampus samples, of approximately the same size per animal were  
758 process as previously described (51, 52). Relative gene expression was determined using  
759 the  $2^{-\Delta\Delta Ct}$  method and normalized using GAPDH. Primers used were the following:

760  
761 CD3: Fw 5' TGACCTCATCGCAACTCTGCTC-3' Rev 5'  
762 TCAGCAGTGCTTGAACCTCAGC-3'

763  
764 Ifit1: Fw 5' CTGAGATGTCACTTCACATGGAA-3' Rev 5' GTGCATCCCCAATGGGTCT-  
765 3'

766  
767 Rtp: Fw 5' TGGGAGCAGACATTTCAAGAAC-3', Rev  
768 5'ACCTGAGCAGAGGTCCAACCTT-3'

769 Gbp10: Fw 5' GGAGGCTCAAGAGAAAAGTCACA-3', Rev 5'  
770 AAGGAAAGCCTTTTGATCCTTCAGC-3'

771  
772 CCL2: Fw 5' GCTGACCCCAAGAAGGAATG-3' Rev 5' GTGCTTGAGGTGGTTGTGGA-  
773 3'

774  
775 IL1 $\beta$ : Fw 5' TGTAATGAAAGACGGCACACC-3' Rev 5' TCTTCTTTGGGTATTGCTTGG-  
776 3'

777  
778 TNF $\alpha$ : Fw 5' TGCCTATGTCTCAGCCTCTTC-3' Rev 5' GAGGCCATTTGGGAACTTCT-  
779 3'

780  
781 IL-6: Fw 5' TACCACTTCACAAGTCGGAGGC-3' Rev 5'  
782 CTGCAAGTGCATCATCGTTGTTTC-3'

783  
784 GAPDH: Fw 5' AAATGGTGAAGGTCGGTGTG-3' Rev 5' TGAAGGGGTCGTTGATGG-  
785 3'

786  
787 Flow Cytometric Analysis. To assess circulating cell populations peripheral blood was  
788 collected by cardiac puncture and transferred into an EDTA collection tube. Blood was  
789 aliquoted into flow cytometry staining tubes and stained with surface antibodies for 30-60  
790 min at room temperature (53). Surface antibodies included anti-CD45 (FITC-conjugated;  
791 BD Biosciences), Ly-6G (PE-conjugated; BD Biosciences), CD8 (PE-Cy7-conjugated; BD  
792 Biosciences), and CD4 (APC-conjugated; BD Biosciences). Leukocyte subpopulations  
793 were identified as follows: Forward and side scatter was used to exclude debris and  
794 doublet populations. Specific T- cell populations were identified as follows: CD4 T-cell  
795 subsets were CD4+, CD45+, Ly-6G-, CD8-, CD11b-. CD8 T-cell subsets were CD8+,  
796 CD45+, Ly-6G-, CD4-,CD11b-. After surface antibody staining, red blood cells were lysed



797 with RBC lysis (BD Biosciences). Data were collected on an LSRII (BD) and analyzed  
798 with Flowjo™ software (v10, Tree Star Inc.).

799

#### 800 **Statistics.**

801 *Figure 1B-* Student's t-test ( $p < 0.05$ ). Old  $n = 10$ ; Old + ISRIB  $n = 10$ .

802 *Figure 1C-* One-way ANOVA ( $F = 18.8$ ,  $p < 0.001$ ); with Tukey post-hoc analysis. Young  
803  $n = 5$ , Old = 3, Old + ISRIB = 3.

804 *Figure 2B-* One-way ANOVA ( $F = 5.3$ ,  $p < 0.05$ ); with Tukey post-hoc analysis. Young  $n$   
805 = 10; Old  $n = 25$ ; Old + ISRIB  $n = 21$ .

806 *Figure 2C-* Two-way repeated measures ANOVA revealed a significant group ( $p < 0.01$ )  
807 and time effect ( $p < 0.01$ ). Old  $n = 18$ ; Old + ISRIB  $n = 16$ .

808 *Figure 2D-* Student t-test ( $p < 0.05$ ). Old  $n = 18$ ; Old + ISRIB  $n = 16$ .

809 *Figure 3B-* One-way ANOVA ( $F = 4.461$ ,  $p < 0.05$ ); with Tukey post-hoc analysis.

810 Neurons:  $n = 10$  Young (5 animals);  $n = 12$  Old (5 animals),  $n = 19$  Old + ISRIB (7  
811 animals) with 1-5 neurons recorded per animal.

812 *Figure 3E-* One-way ANOVA ( $F = 18.57$ ,  $p < 0.001$ ) with Tukey post-hoc analysis.

813 Young  $n = 7$  slides (2 animals); Old  $n = 12$  slides (3 mice); Old + ISRIB  $n = 17$  slides (4  
814 mice).

815 *Figure 4A-* EdgeR Exact test, FDR 0.05.

816 *Figure 4B-* One-way ANOVA ( $F = 8.8$ ;  $p < 0.01$ ) with a Tukey-post analysis. Young  $n =$   
817 8; Old  $n = 7$ ; Old + ISRIB  $n = 8$ .

818 *Figure 4C-* One-way ANOVA ( $F = 4.2$ ,  $p < 0.05$ ) with a Tukey-post analysis. Young  $n =$   
819 8; Old  $n = 7$ ; Old + ISRIB  $n = 7$ .

820 *Figure 4D-* One-way ANOVA ( $F = 12.23$ ,  $p < 0.001$ ) with a Tukey-post analysis. Young  
821  $n = 8$ ; Old  $n = 7$ ; Old + ISRIB  $n = 8$ .

822 *Figure 4E-* One-way ANOVA ( $F = 5.2$ ;  $p < 0.05$ ) with a Tukey-post analysis. Young  $n =$   
823 8; Old  $n = 7$ ; Old + ISRIB  $n = 8$ .

824 *Figure 4F-* Linear regression was measured by Pearson R correlation ( $R^2 = 0.27$ ;  $F =$   
825 8.0,  $p < 0.001$ ).

826 *Figure 4G-* Student t-test ( $p < 0.05$ ). Old  $n = 7$ ; Old + ISRIB  $n = 8$ .

827

828 **Supplemental Table 1. List of Electrophysiology Reagents.**

| <b>REAGENTS FOR PATCHING</b>     | <b>Company</b>               | <b>Product#</b> |
|----------------------------------|------------------------------|-----------------|
| Sucrose                          | Sigma-Aldrich, St. Louis, MO | S5016           |
| NaH <sub>2</sub> PO <sub>4</sub> | Sigma-Aldrich, St. Louis, MO | S9638           |
| NaHCO <sub>3</sub>               | Sigma-Aldrich, St. Louis, MO | S6014           |
| KCl                              | Sigma-Aldrich, St. Louis, MO | P9333           |
| NaCl                             | Sigma-Aldrich, St. Louis, MO | S9888           |
| CaCl <sub>2</sub>                | Sigma-Aldrich, St. Louis, MO | 223506          |
| MgCl <sub>2</sub>                | Sigma-Aldrich, St. Louis, MO | M9272           |
| Dextrose                         | Sigma-Aldrich, St. Louis, MO | G5767           |
| Ascorbic acid                    | Sigma-Aldrich, St. Louis, MO | A5960           |
| Sodium pyruvate                  | Sigma-Aldrich, St. Louis, MO | P5280           |
| Potassium gluconate              | Sigma-Aldrich, St. Louis, MO | P1847           |
| HEPES                            | Sigma-Aldrich, St. Louis, MO | H3375           |
| MgATP                            | Sigma-Aldrich, St. Louis, MO | A9187           |
| Na <sub>3</sub> GTP              | Sigma-Aldrich, St. Louis, MO | G8877           |
| 2K-phosphocreatine               | Millipore, Burlington, MA    | 237911          |
| Biocytin                         | Tocris, Bristol, UK          | 3349            |

829  
830

831  
832  
833  
834  
835  
836  
837  
838  
839  
840  
841  
842  
843  
844  
845  
846  
847  
848  
849  
850  
851  
852  
853  
854  
855  
856  
857  
858  
859  
860  
861  
862  
863  
864  
865  
866

## ACKNOWLEDGEMENTS

This work was supported by the generous support of the Rogers Family (to S.R. and P.W.), the UCSF Weill Innovation Award (to S.R. and P.W.), the NIH/National Institute on Aging Grant R01AG056770 (to S.R.), the NRSA post-doctoral fellowship from the NIA F32AG054126 (to K.K), the National Institute for General Medicine (NIGMS) Initiative for Maximizing Student Development (R25GM056847) and the National Science Foundation (NSF) Graduate Fellowship Program (To E.S.F), the UCSF Clinical and National Center for Advanced Translational Sciences at NIH (UCSF-CTSI Grant Number TL1 TR001871) and the NIH/NINDS (K08NS114170) (To A.N), the Programa de Apoyo a Centros con Financiamiento Basal AFB 170004 (to S.B.). P.W. is an Investigator of the Howard Hughes Medical Institute.

We thank Dr. Vikaas Sohal for providing equipment for electrophysiological recordings and advice on analysis. We thank Dr. Spyros Darmanis and Rene Sit from the Chan Zuckerberg Biohub for their assistance with analysis.

The authors would like to thank Praxis Biotech LLC, San Francisco, CA for providing samples of Cmp-003, for use in experiments described in this publication.

Microscopic imaging was obtained at the HDFCCC Laboratory for Cell Analysis Shared Resource Facility which is funded through grants from NIH (P30CA082103 and S10 ODo21818-01).

## CONFLICT OF INTEREST

SB is an employee of Praxis Biotech. SB, GU and LD work at Fundacion Ciencia & Vida and receive partial funding from Praxis Biotech. P.W. is an inventor on U.S. Patent 9708247 held by the Regents of the University of California that describes ISRIB and its analogs. Rights to the invention have been licensed by UCSF to Calico. P.W. is a consultant for Praxis Biotech LLC and Black Belt TX Limited. The authors declare no other competing interests.

867  
868  
869  
870  
871  
872  
873  
874  
875  
876  
877  
878  
879  
880  
881  
882  
883  
884  
885  
886  
887  
888  
889  
890  
891  
892  
893  
894  
895  
896  
897  
898  
899  
900  
901  
902  
903  
904  
905  
906  
907  
908  
909  
910  
911  
912

## REFERENCES

1. *Cognitive Aging. Progress in Understanding and Opportunities for Action* (2015).
2. S. L. Connelly, L. Hasher, R. T. Zacks, Age and reading: the impact of distraction. *Psychol Aging* **6**, 533-541 (1991).
3. N. D. Anderson, F. I. Craik, M. Naveh-Benjamin, The attentional demands of encoding and retrieval in younger and older adults: 1. Evidence from divided attention costs. *Psychol Aging* **13**, 405-423 (1998).
4. A. F. Kramer, S. Hahn, D. Gopher, Task coordination and aging: explorations of executive control processes in the task switching paradigm. *Acta Psychol (Amst)* **101**, 339-378 (1999).
5. N. J. Cepeda, A. F. Kramer, J. C. Gonzalez de Sather, Changes in executive control across the life span: examination of task-switching performance. *Dev Psychol* **37**, 715-730 (2001).
6. *An Aging Nation: The Older Population in the United States* (2014).
7. A. Chou, K. Krukowski, J. M. Morganti, L. K. Riparip, S. Rosi, Persistent Infiltration and Impaired Response of Peripherally-Derived Monocytes after Traumatic Brain Injury in the Aged Brain. *Int J Mol Sci* **19**, (2018).
8. H. Yousef *et al.*, Aged blood impairs hippocampal neural precursor activity and activates microglia via brain endothelial cell VCAM1. *Nat Med* **25**, 988-1000 (2019).
9. S. A. Villeda *et al.*, The ageing systemic milieu negatively regulates neurogenesis and cognitive function. *Nature* **477**, 90-94 (2011).
10. J. M. Castellano *et al.*, Human umbilical cord plasma proteins revitalize hippocampal function in aged mice. *Nature* **544**, 488-492 (2017).
11. J. F. Disterhoft, M. M. Oh, Alterations in intrinsic neuronal excitability during normal aging. *Aging Cell* **6**, 327-336 (2007).
12. E. C. McKiernan, D. F. Marrone, CA1 pyramidal cells have diverse biophysical properties, affected by development, experience, and aging. *PeerJ* **5**, e3836 (2017).
13. M. M. Oh, F. A. Oliveira, J. F. Disterhoft, Learning and aging related changes in intrinsic neuronal excitability. *Front Aging Neurosci* **2**, 2 (2010).
14. V. Rizzo, J. Richman, S. V. Puthanveetil, Dissecting mechanisms of brain aging by studying the intrinsic excitability of neurons. *Front Aging Neurosci* **6**, 337 (2014).
15. L. A. Schimanski, C. A. Barnes, Neural Protein Synthesis during Aging: Effects on Plasticity and Memory. *Front Aging Neurosci* **2**, (2010).
16. V. Azzu, T. G. Valencak, Energy Metabolism and Ageing in the Mouse: A Mini-Review. *Gerontology* **63**, 327-336 (2017).
17. C. Franceschi *et al.*, Inflamm-aging. An evolutionary perspective on immunosenescence. *Ann N Y Acad Sci* **908**, 244-254 (2000).
18. K. Baruch *et al.*, Aging. Aging-induced type I interferon response at the choroid plexus negatively affects brain function. *Science* **346**, 89-93 (2014).
19. B. W. Dulken *et al.*, Single-cell analysis reveals T cell infiltration in old neurogenic niches. *Nature* **571**, 205-210 (2019).

- 913 20. S. A. Villeda *et al.*, Young blood reverses age-related impairments in cognitive  
914 function and synaptic plasticity in mice. *Nat Med* **20**, 659-663 (2014).
- 915 21. J. B. Flexner, L. B. Flexner, E. Stellar, G. De La Haba, R. B. Roberts, Inhibition of  
916 protein synthesis in brain and learning and memory following puromycin. *J*  
917 *Neurochem* **9**, 595-605 (1962).
- 918 22. C. Lopez-Otin, M. A. Blasco, L. Partridge, M. Serrano, G. Kroemer, The  
919 hallmarks of aging. *Cell* **153**, 1194-1217 (2013).
- 920 23. M. C. Ingvar, P. Maeder, L. Sokoloff, C. B. Smith, Effects of ageing on local rates  
921 of cerebral protein synthesis in Sprague-Dawley rats. *Brain* **108 ( Pt 1)**, 155-170  
922 (1985).
- 923 24. C. B. Smith, Y. Sun, L. Sokoloff, Effects of aging on regional rates of cerebral  
924 protein synthesis in the Sprague-Dawley rat: examination of the influence of  
925 recycling of amino acids derived from protein degradation into the precursor pool.  
926 *Neurochem Int* **27**, 407-416 (1995).
- 927 25. H. P. Harding *et al.*, An integrated stress response regulates amino acid  
928 metabolism and resistance to oxidative stress. *Mol Cell* **11**, 619-633 (2003).
- 929 26. A. Chou *et al.*, Inhibition of the integrated stress response reverses cognitive  
930 deficits after traumatic brain injury. *Proc Natl Acad Sci U S A* **114**, E6420-E6426  
931 (2017).
- 932 27. K. Krukowski *et al.*, Integrated Stress Response Inhibitor Reverses Sex-  
933 Dependent Behavioral and Cell-Specific Deficits after Mild Repetitive Head  
934 Trauma. *J Neurotrauma*, (2020).
- 935 28. C. C. Kaczorowski, J. F. Disterhoft, Memory deficits are associated with impaired  
936 ability to modulate neuronal excitability in middle-aged mice. *Learn Mem* **16**, 362-  
937 366 (2009).
- 938 29. O. von Bohlen und Halbach, C. Zacher, P. Gass, K. Unsicker, Age-related  
939 alterations in hippocampal spines and deficiencies in spatial memory in mice. *J*  
940 *Neurosci Res* **83**, 525-531 (2006).
- 941 30. B. Xu *et al.*, Loss of thin spines and small synapses contributes to defective  
942 hippocampal function in aged mice. *Neurobiol Aging* **71**, 91-104 (2018).
- 943 31. E. B. Bloss *et al.*, Evidence for reduced experience-dependent dendritic spine  
944 plasticity in the aging prefrontal cortex. *J Neurosci* **31**, 7831-7839 (2011).
- 945 32. N. Yasumatsu, M. Matsuzaki, T. Miyazaki, J. Noguchi, H. Kasai, Principles of  
946 long-term dynamics of dendritic spines. *J Neurosci* **28**, 13592-13608 (2008).
- 947 33. U. I. Onat *et al.*, Intercepting the Lipid-Induced Integrated Stress Response  
948 Reduces Atherosclerosis. *J Am Coll Cardiol* **73**, 1149-1169 (2019).
- 949 34. A. Deczkowska *et al.*, Mef2C restrains microglial inflammatory response and is  
950 lost in brain ageing in an IFN-I-dependent manner. *Nat Commun* **8**, 717 (2017).
- 951 35. A. G. Hinnebusch, I. P. Ivanov, N. Sonenberg, Translational control by 5'-  
952 untranslated regions of eukaryotic mRNAs. *Science* **352**, 1413-1416 (2016).
- 953 36. N. Sonenberg, A. G. Hinnebusch, Regulation of translation initiation in  
954 eukaryotes: mechanisms and biological targets. *Cell* **136**, 731-745 (2009).
- 955 37. A. Chen *et al.*, Inducible enhancement of memory storage and synaptic plasticity  
956 in transgenic mice expressing an inhibitor of ATF4 (CREB-2) and C/EBP  
957 proteins. *Neuron* **39**, 655-669 (2003).

- 958 38. S. Pasini, C. Corona, J. Liu, L. A. Greene, M. L. Shelanski, Specific  
959 downregulation of hippocampal ATF4 reveals a necessary role in synaptic  
960 plasticity and memory. *Cell Rep* **11**, 183-191 (2015).
- 961 39. J. Alamed, D. M. Wilcock, D. M. Diamond, M. N. Gordon, D. Morgan, Two-day  
962 radial-arm water maze learning and memory task; robust resolution of amyloid-  
963 related memory deficits in transgenic mice. *Nat Protoc* **1**, 1671-1679 (2006).
- 964 40. X. Feng, K. Krukowski, T. Jopson, S. Rosi, Delayed-matching-to-place Task in a  
965 Dry Maze to Measure Spatial Working Memory in Mice. *Bio Protoc* **7**, (2017).
- 966 41. M. A. Oliveira Pisco A, Schaum N, Karkanias J, Neff NF, Darmanis S, Wyss-  
967 Coray T, Quake SR, A Single Cell Transcriptomic Atlas Characterizes Aging  
968 Tissues in the Mouse. *bioRxiv*, (2020).
- 969 42. D. Mrdjen *et al.*, High-Dimensional Single-Cell Mapping of Central Nervous  
970 System Immune Cells Reveals Distinct Myeloid Subsets in Health, Aging, and  
971 Disease. *Immunity* **48**, 599 (2018).
- 972 43. A. Dobin *et al.*, STAR: ultrafast universal RNA-seq aligner. *Bioinformatics* **29**, 15-  
973 21 (2013).
- 974 44. H. Li *et al.*, The Sequence Alignment/Map format and SAMtools. *Bioinformatics*  
975 **25**, 2078-2079 (2009).
- 976 45. Y. Liao, G. K. Smyth, W. Shi, The Subread aligner: fast, accurate and scalable  
977 read mapping by seed-and-vote. *Nucleic Acids Res* **41**, e108 (2013).
- 978 46. M. D. Robinson, D. J. McCarthy, G. K. Smyth, edgeR: a Bioconductor package  
979 for differential expression analysis of digital gene expression data. *Bioinformatics*  
980 **26**, 139-140 (2010).
- 981 47. V. K. Mootha *et al.*, PGC-1alpha-responsive genes involved in oxidative  
982 phosphorylation are coordinately downregulated in human diabetes. *Nat Genet*  
983 **34**, 267-273 (2003).
- 984 48. A. Subramanian *et al.*, Gene set enrichment analysis: a knowledge-based  
985 approach for interpreting genome-wide expression profiles. *Proc Natl Acad Sci U*  
986 *S A* **102**, 15545-15550 (2005).
- 987 49. J. Reimand *et al.*, Pathway enrichment analysis and visualization of omics data  
988 using g:Profiler, GSEA, Cytoscape and EnrichmentMap. *Nat Protoc* **14**, 482-517  
989 (2019).
- 990 50. R. Janky *et al.*, iRegulon: from a gene list to a gene regulatory network using  
991 large motif and track collections. *PLoS Comput Biol* **10**, e1003731 (2014).
- 992 51. K. Krukowski *et al.*, Traumatic Brain Injury in Aged Mice Induces Chronic  
993 Microglia Activation, Synapse Loss, and Complement-Dependent Memory  
994 Deficits. *Int J Mol Sci* **19**, (2018).
- 995 52. K. Krukowski *et al.*, Female mice are protected from space radiation-induced  
996 maladaptive responses. *Brain Behav Immun* **74**, 106-120 (2018).
- 997 53. K. Krukowski, T. Jones, M. Campbell-Beachler, G. Nelson, S. Rosi, Peripheral T  
998 Cells as a Biomarker for Oxygen-Ion-Radiation-Induced Social Impairments.  
999 *Radiat Res* **190**, 186-193 (2018).

1000

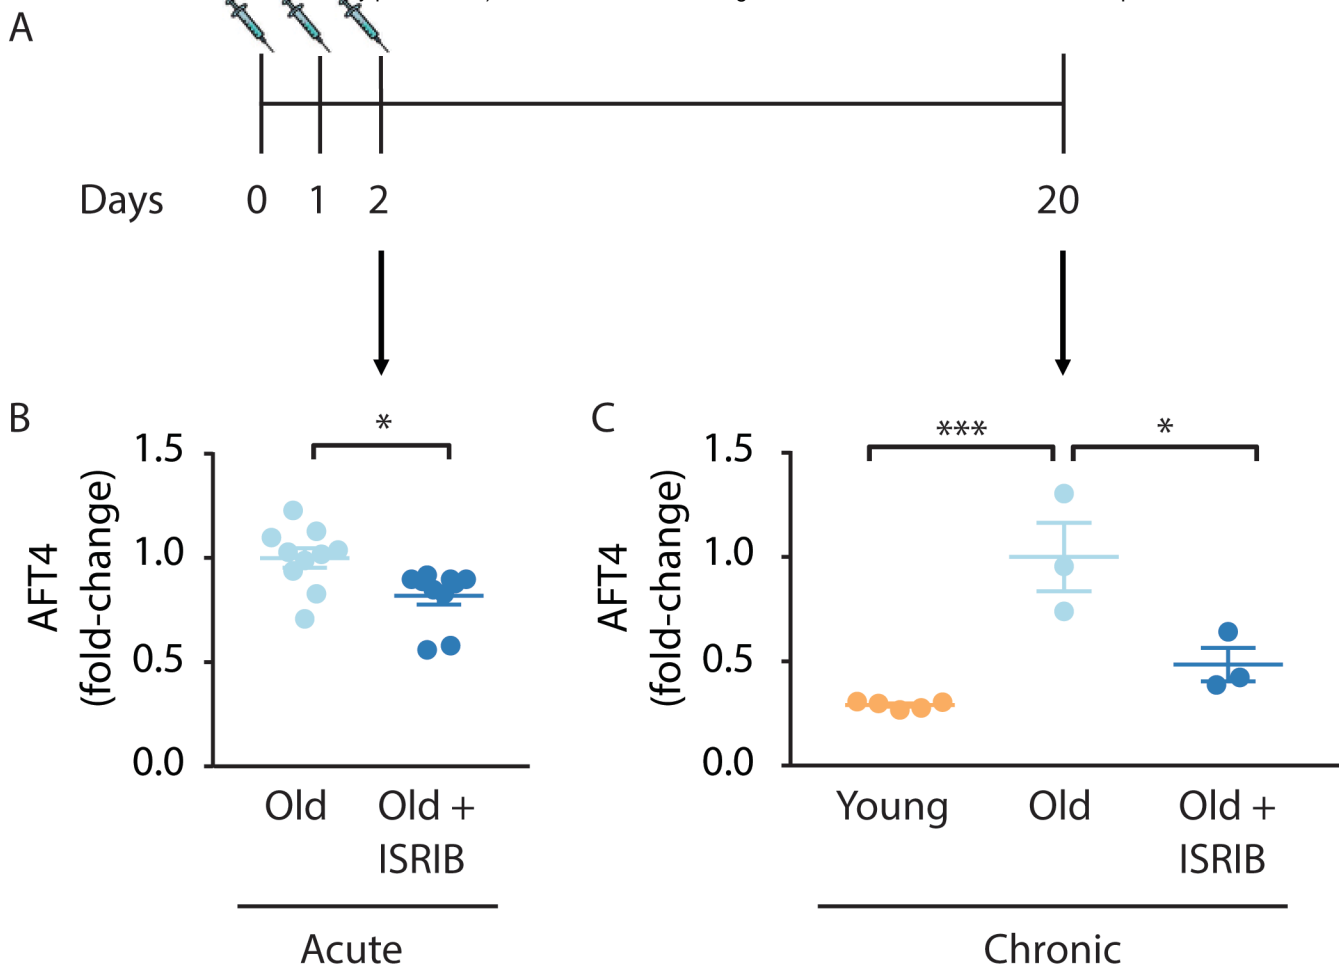

# Figure 2

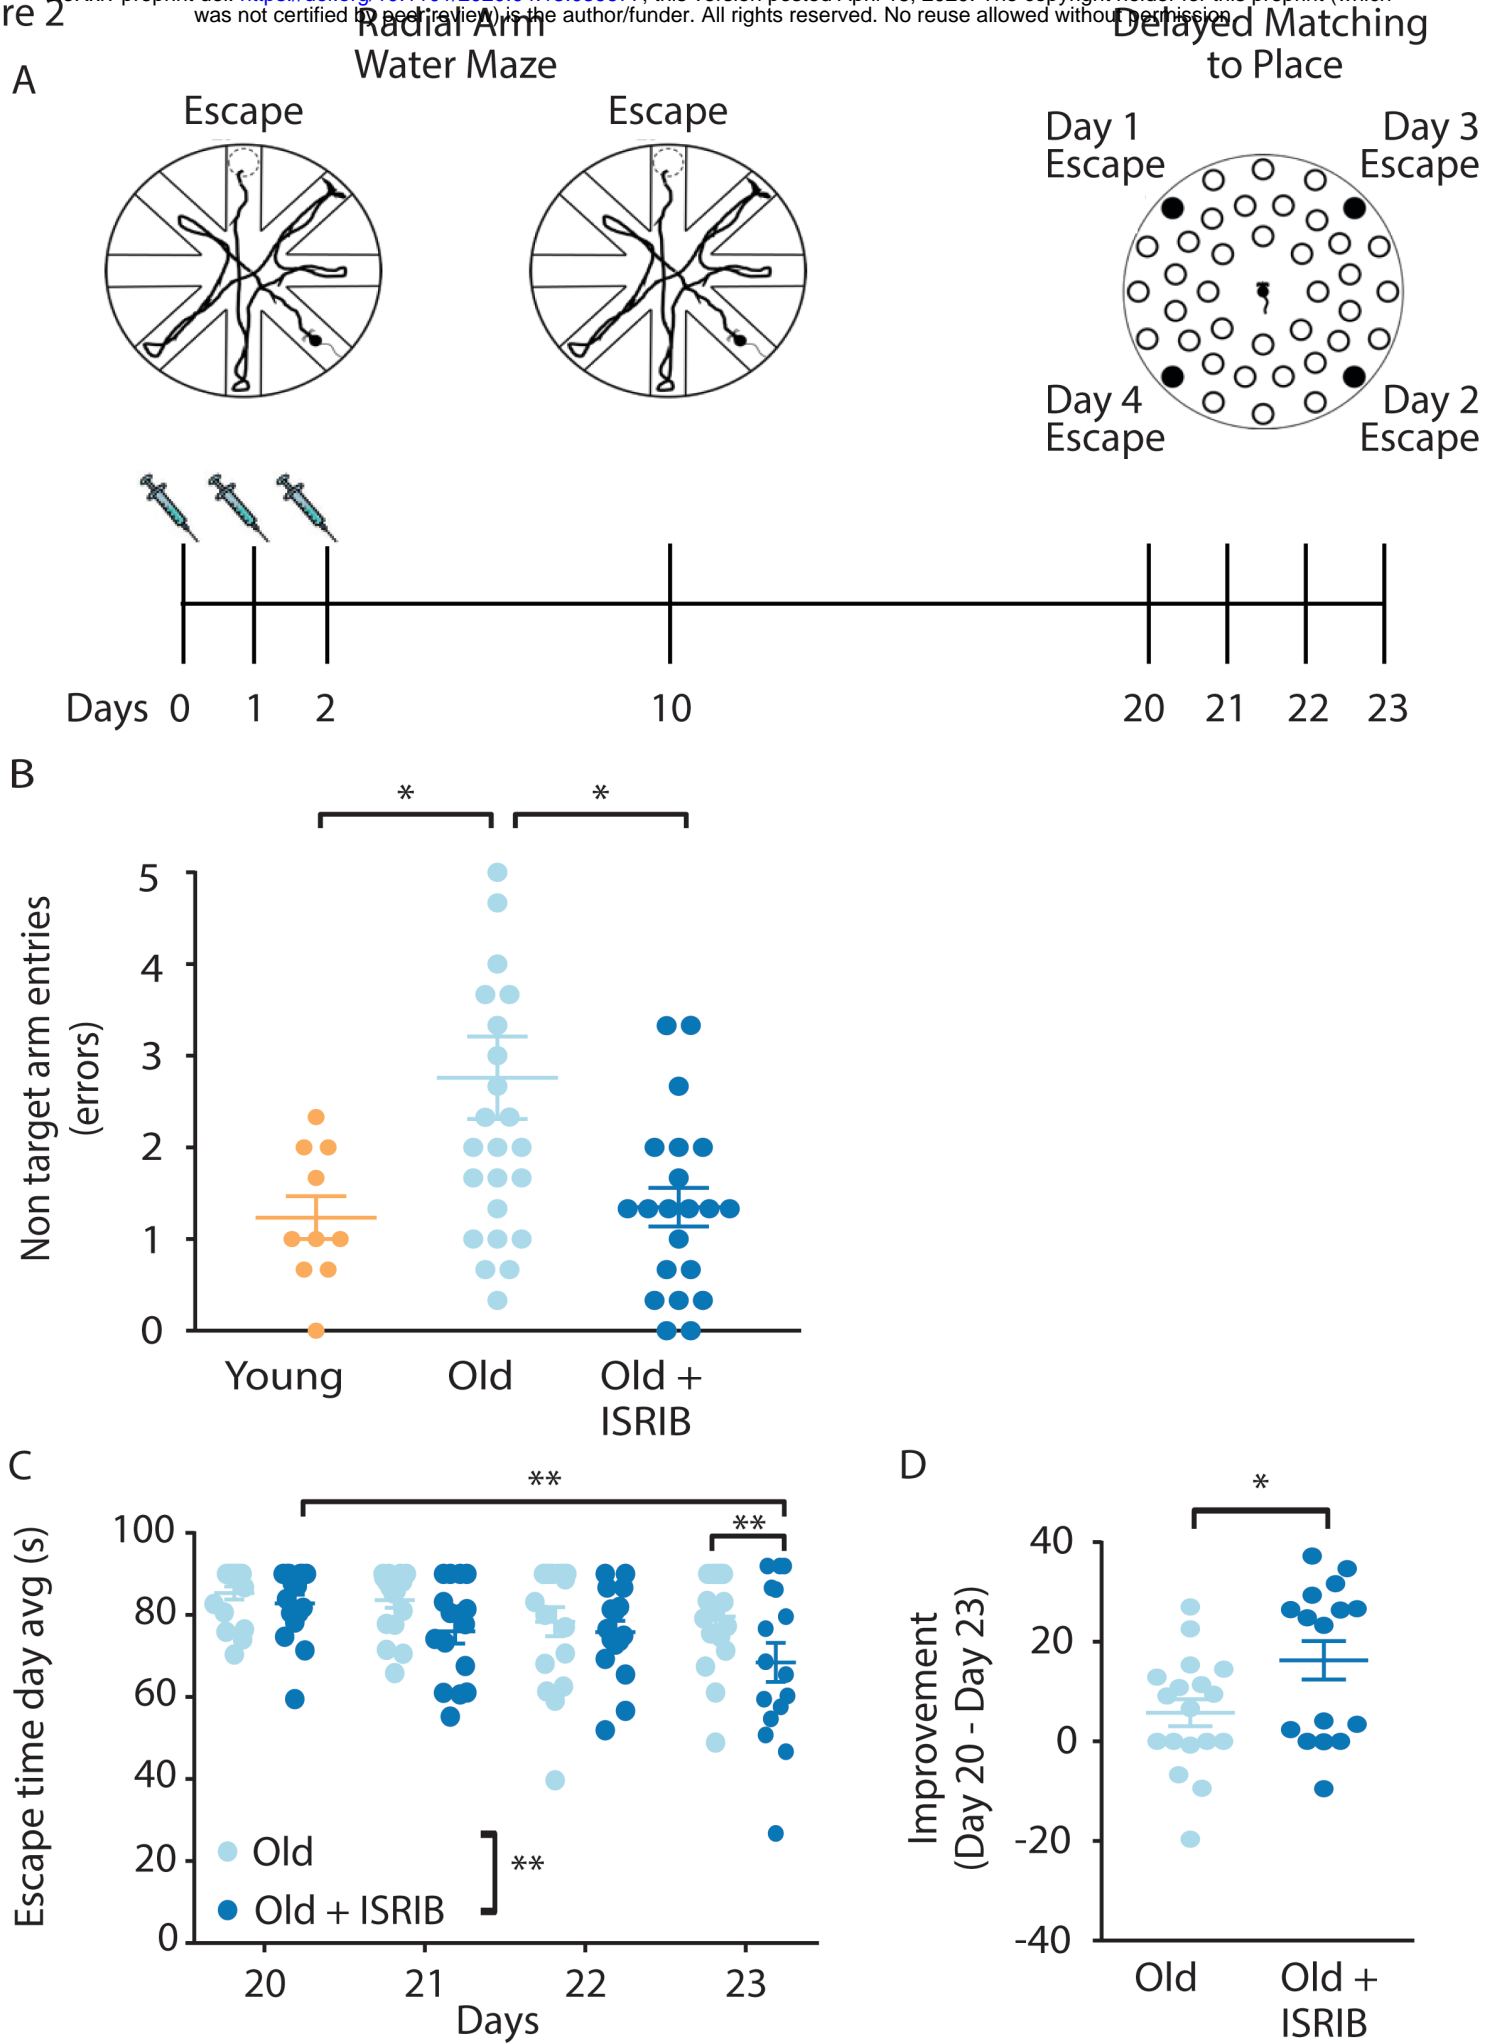



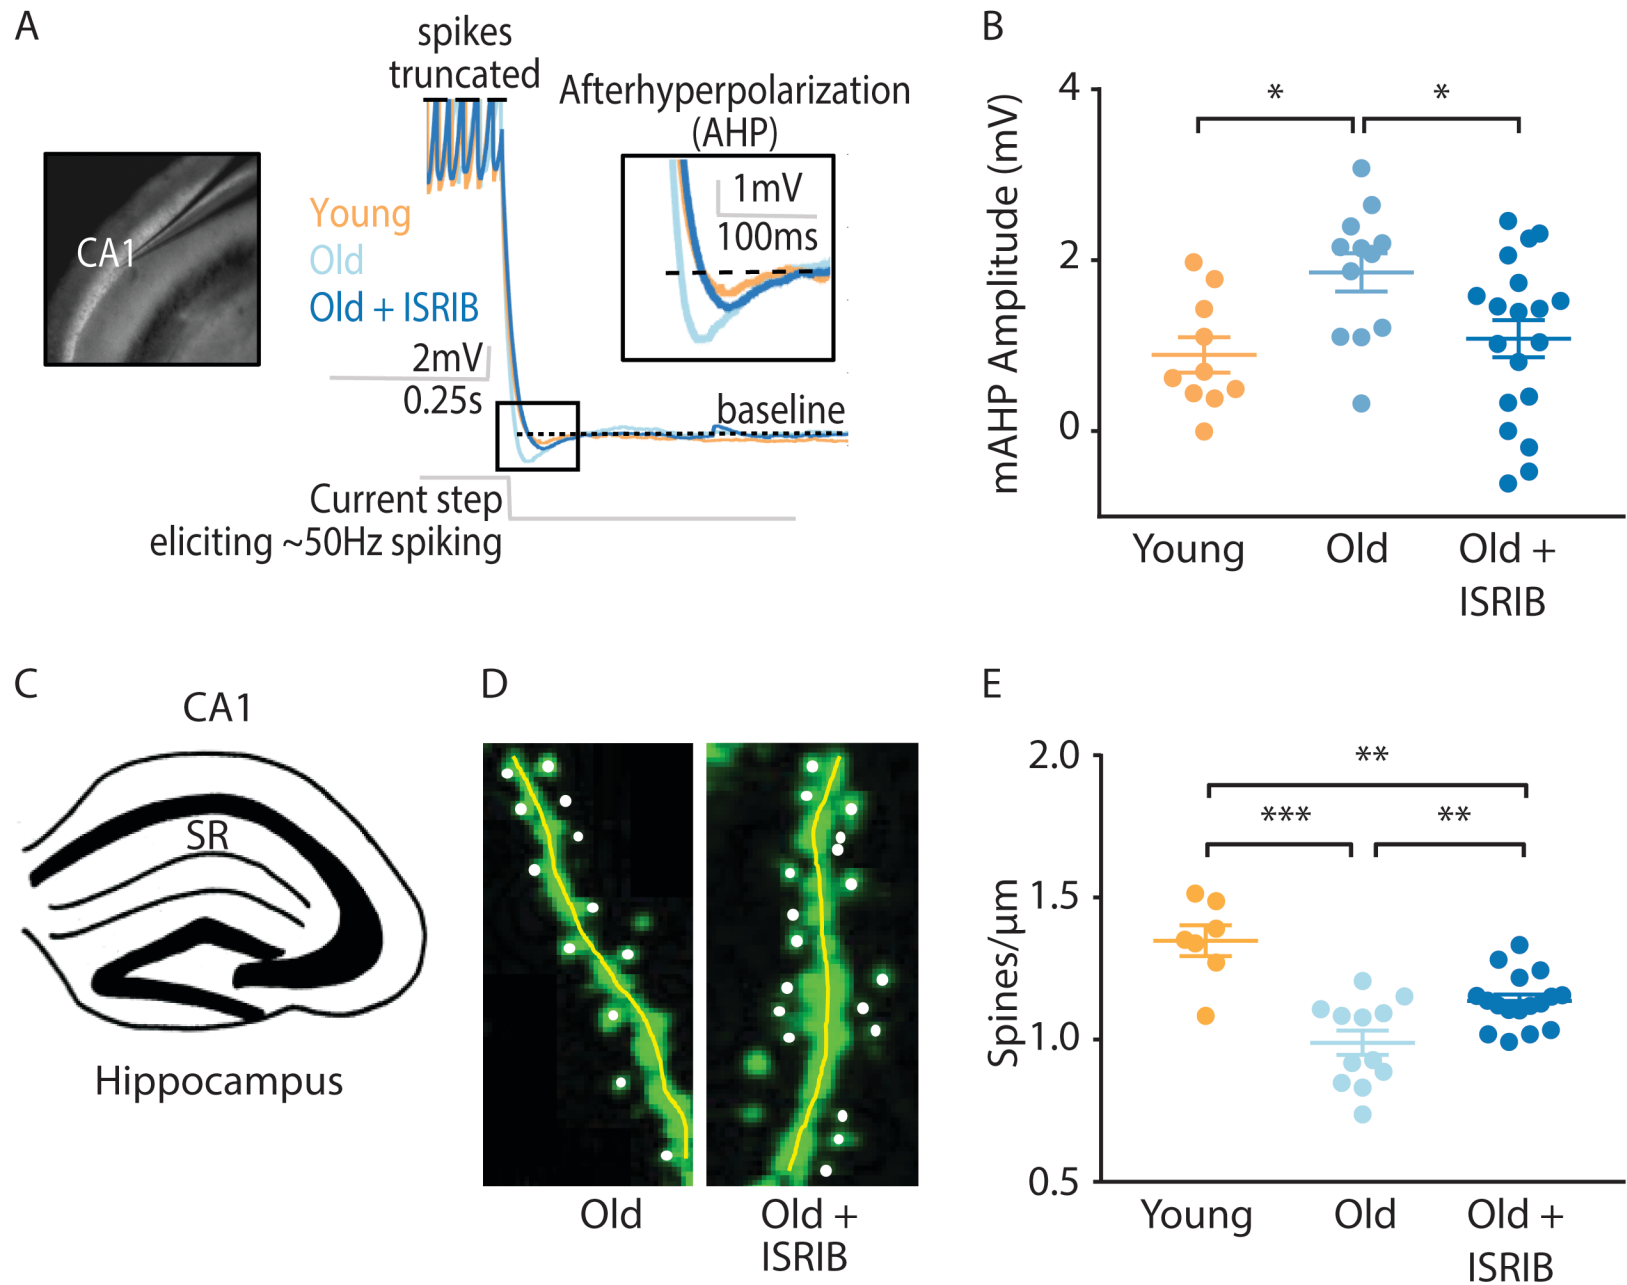

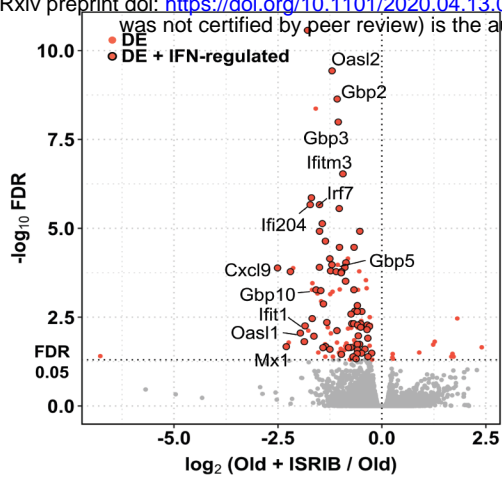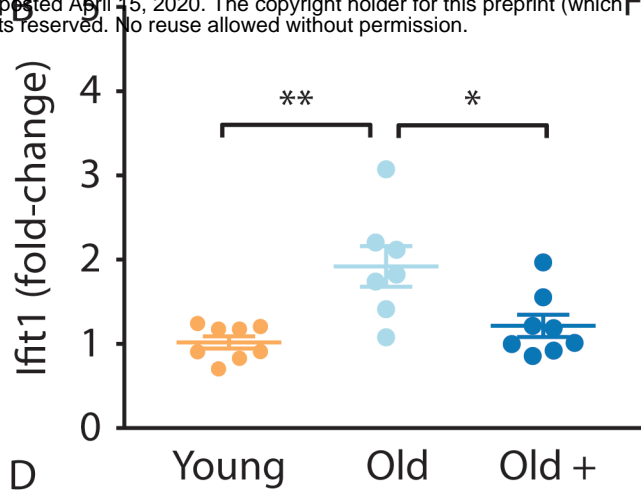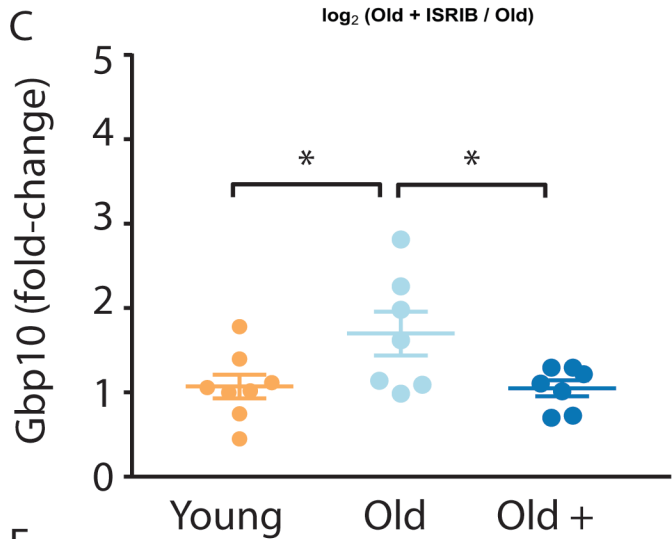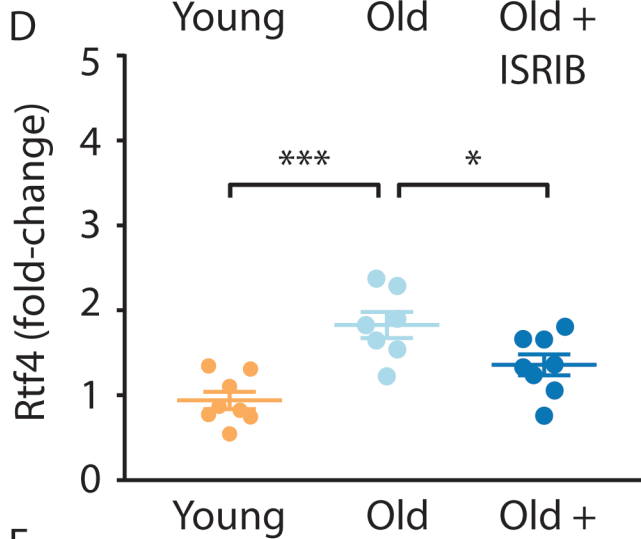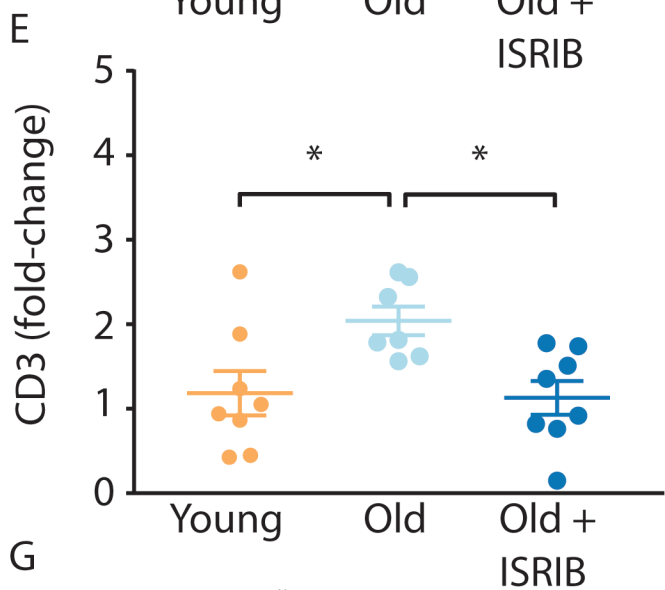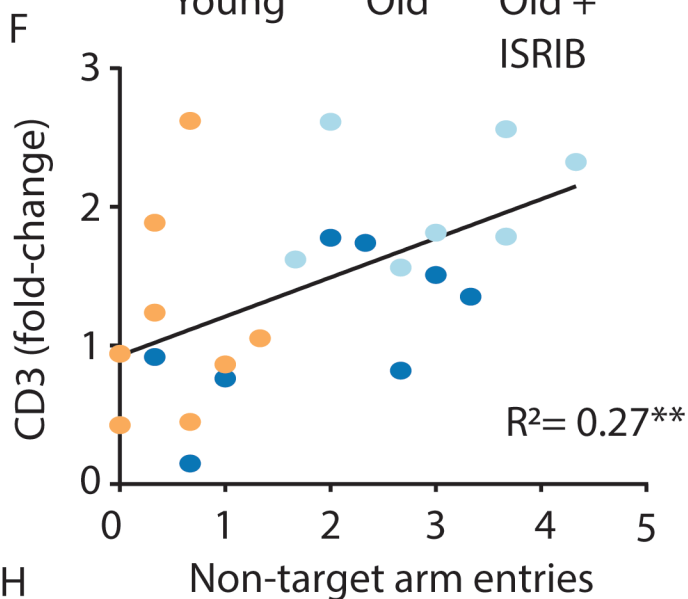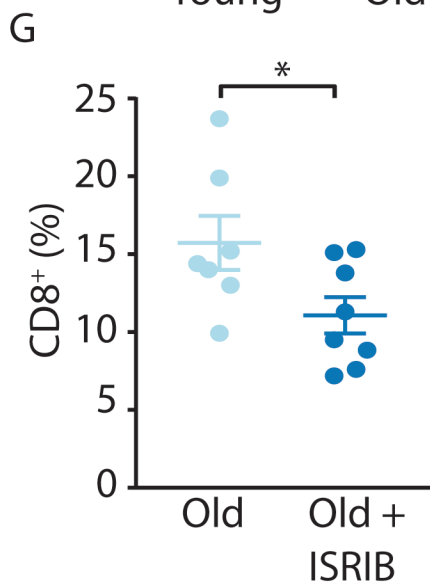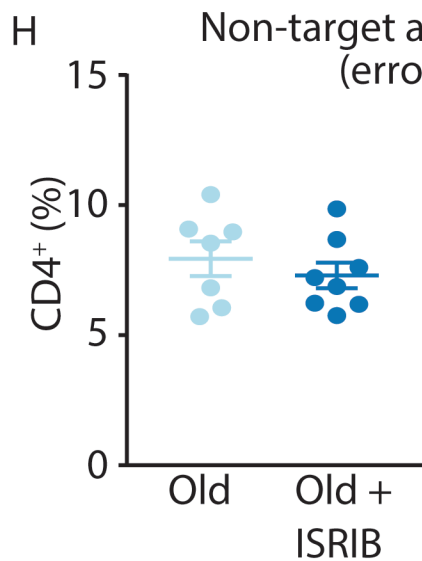

Source: https://www.biorxiv.org/content/10.1101/2020.04.13.039677v1.full.pdf
